# 1 MicroRNA-449 sustains cilia-related networks in the absence of transcription factor TAp73

2  
3 Merit Wildung<sup>1#</sup>, Tilman U. Esser<sup>1#</sup>, Katie B. Grausam<sup>2,3</sup>, Cornelia Wiedwald<sup>1</sup>, Li Li<sup>2</sup>, Jessica  
4 Zylla<sup>2</sup>, Ann-Kathrin Guenther<sup>4</sup>, Magdalena Wienken<sup>5</sup>, Evrim Ercetin<sup>1</sup>, Felix Bremmer<sup>6</sup>, Orr  
5 Shomroni<sup>7</sup>, Stefan Andreas<sup>1</sup>, Haotian Zhao<sup>2,3,8\*</sup> and Muriel Lizé<sup>1,\*</sup>

6  
7 # = equal contribution; \* = corresponding authors

8  
9 1) Molecular & Experimental Pneumology Group, Clinic for Cardiology and  
10 Pneumology, University Medical Center Goettingen, Germany

11 2) Cancer Biology and Immunotherapeutics Group, Sanford Research, Sioux Falls,  
12 South Dakota, USA

13 3) Division of Basic Biomedical Sciences, University of South Dakota, Sanford School  
14 of Medicine, Vermillion, South Dakota

15 4) Department of Genes and Behavior, MPI for Biophysical Chemistry, Goettingen,  
16 Germany

17 5) Institute of Molecular Oncology, University Medical Center Goettingen, Germany

18 6) Institute of Pathology, University Medical Center Goettingen, Goettingen, Germany

19 7) Microarray and Deep-Sequencing Core Facility, University Medical Center  
20 Goettingen, Germany

21 8) Department of Biomedical Sciences, New York Institute of Technology College of  
22 Osteopathic Medicine, Old Westbury, New York, USA

## 23 24 25 Abstract

26  
27 Motile cilia serve vital functions in development, homeostasis and regeneration. We recently  
28 demonstrated that TAp73 is an essential transcriptional regulator of respiratory motile  
29 multiciliogenesis. Here we show that TAp73 is expressed in multiciliated cells (MCCs) of diverse  
30 tissues. Analysis of *TAp73*<sup>-/-</sup> animals revealed that TAp73 regulates *Foxj1*, *Rfx2/3*, axonemal  
31 dyneins *Dnali1* and *Dnai1*, plays a pivotal role in the generation of MCCs in reproductive ducts,  
32 and contributes to fertility. However, TAp73 is dispensable for brain MCCs, and robust activity  
33 from cilia-related networks is maintained in *TAp73*<sup>-/-</sup>. Consistent with *TAp73*<sup>-/-</sup>, its target *miR34bc*  
34 was reduced, whereas strong and specific induction of *miR449* was observed, along with an  
35 increase in *E2f4* that induced transcriptional response from *miR449* genomic regions. Depletion  
36 of both *TAp73* and *miR449* resulted in defective multiciliogenesis in the brain and hydrocephalus,  
37 indicating that miR449 and potentially additional pro-ciliogenic factors cooperate with TAp73 to  
38 ensure brain multiciliogenesis and CP development.

## 43 Introduction

44  
45 Cilia are hair-like appendages protruding from the cell membrane into the surrounding  
46 environment. While single immotile primary cilia are a common organelle of most mammalian  
47 cells, motile cilia are restricted to a subset of cell types, including multiciliated cells (MCCs) lining  
48 brain ventricles, the tracheal, bronchial and oviduct epithelium as well as the epithelium of the  
49 efferent duct (ED) in the male reproductive tract (Spassky & Meunier, 2017).

50  
51 Motile multiciliogenesis requires precise regulation of the production, transport and assembly of  
52 a large amount of different structural components, a process critically dependent on a hierarchical  
53 network of transcriptional and posttranscriptional regulators (Choksi, Lauter, Swoboda, & Roy,  
54 2014). Geminin Coiled-Coil Domain Containing 1 (GEMC1) (Arbi et al., 2016; Terré et al., 2016;  
55 Zhou et al., 2015) and multiciliate differentiation and DNA synthesis associated cell cycle protein  
56 (MCIDAS or Multicilin) (Boon et al., 2014; Ma, Quigley, Omran, & Kintner, 2014; Stubbs, Vladoar,  
57 Axelrod, & Kintner, 2012), members of Geminin family, are early regulators of MCC fate  
58 downstream of the NOTCH pathway. Inhibition of the NOTCH pathway e.g. by microRNA-449  
59 (miR449) is required for multiciliogenesis through de-repression of the transcriptional network of  
60 *GEMC1*, *MCIDAS*, E2F transcription factors (*E2F4*, *E2F5*), forkhead box J1 (*FOXJ1*), and v-myb  
61 avian myeloblastosis viral oncogene homolog (*MYB*) (Danielian et al., 2007; Danielian, Hess, &  
62 Lees, 2016). Disturbance of the molecular circuit leads to defective multiciliogenesis and  
63 ciliopathies in the airways, reproductive tracts and the brain.

64  
65 Transformation related protein 73 (*Trp73*) is a member of the p53 family with distinct isoforms  
66 generated from two alternative promoters: isoforms with N-terminal transactivation domain  
67 (TAp73), and N-terminally truncated dominant-negative isoforms ( $\Delta$ Np73). Recently, we and  
68 others showed that TAp73 is essential for airway multiciliogenesis (Marshall et al., 2016;  
69 Nemajerova et al., 2016). Gene expression analyses and chromatin immunoprecipitation (ChIP)  
70 identified TAp73 as a critical regulator of multiciliogenesis: TAp73 acts downstream of  
71 E2F4/MCIDAS, and regulates the expression of *FOXJ1*, *RFX2*, and *RFX3* in pulmonary tissues  
72 (Blatt, Yan, Wuerffel, Hamilos, & Brody, 1999; Brody, Yan, Wuerffel, Song, & Shapiro, 2000;  
73 Chen, Knowles, Hebert, & Hackett, 1998; Nemajerova et al., 2016; Yu, Ng, Habacher, & Roy,  
74 2008).

75  
76 The fallopian tube (FT) of the female reproductive tract consists of the isthmus, the ampulla, and  
77 the infundibulum. MCCs here possess hundreds of motile cilia beating in a wave-like manner that,  
78 along with musculature contraction, moves the oocyte or zygote towards the uterus (**Figure 1B**)  
79 (Crow, Amso, Lewin, & Shaw, 1994; Lyons, Saridogan, & Djahanbakhch, 2006; Raidt et al., 2015).  
80 Defects in ciliary functions may lead to ectopic pregnancy or infertility (Lyons et al., 2006; Vanaken  
81 et al., 2017). In the male reproductive tract, MCCs in the efferent ducts (EDs) transport the  
82 spermatozoa from testis to epididymis (**Figure 1D**) (Ilio & Hess, 1994; Lambot et al., 2009).

83  
84 Multiciliated cells (MCCs) in the brain can be found in a single layer of ependymal cells facing the  
85 ventricles and choroid plexus (CP) (**Figure 1F**). The CP epithelium, a specialized secretory  
86 epithelium that secretes cerebrospinal fluid, arise from monociliated progenitors in the roof plate

87 around embryonic day (E) 12 (M. P. Lun et al., 2015; Silva-Vargas, Maldonado-Soto, Mizrak,  
88 Codega, & Doetsch, 2016). Ependymal cells in mice are specified around day E16 and form  
89 multiple motile cilia on the apical surface after birth to facilitate cerebrospinal fluid movement  
90 (Melody P. Lun, Monuki, & Lehtinen, 2015; Spassky et al., 2005). Defects in the ependymal and  
91 CP lineages are implicated in aging, hydrocephalus, and brain tumors (Del Bigio, 2010; Li et al.,  
92 2016).

93  
94 In this study, we detected robust TAp73 expression in MCCs in diverse tissues. Consistently,  
95 TAp73 loss leads to a profound reduction of multiciliogenesis in the oviduct and EDs, and a  
96 significant loss of activity in TAp73-dependent transcriptional network. However, TAp73 is  
97 dispensable for MCCs in the brain that maintain a robust multiciliogenesis program. Molecular  
98 studies revealed significant alterations in pro-ciliogenic *miR-34/449* family in TAp73<sup>-/-</sup> brain:  
99 reduced expression of TAp73 target *miR34bc* concurrent with strong *miR449* induction,  
100 suggesting that *miR449* induction might partially rescue brain ciliogenesis in the absence of  
101 TAp73. Indeed, loss of both TAp73 and *miR449* leads to a dramatic loss of multiciliogenesis in  
102 the CP and severe hydrocephalus. Therefore, the molecular network governing multiciliated cell  
103 fate is subjected to tissue-specific feedback modulation.

104

105

## 106 Results

107

### 108 TAp73 is expressed in diverse multiciliated epithelia in development and adulthood

109

110 We and others previously showed that TAp73 expressed in respiratory epithelia controls  
111 multiciliogenesis (Marshall et al., 2016; Nemajerova et al., 2016). However, little is known about  
112 the expression and function of TAp73 in other multiciliated cell types. To this end, quantitative  
113 PCR with reverse transcription (RT-qPCR) revealed abundant TAp73 mRNA in ciliated tissues  
114 including efferent ducts (EDs), fallopian tubes (FTs), and brain ventricles/choroid plexus (CP), in  
115 addition to the testis as previously described (Holembowski et al., 2014; Inoue et al., 2014),  
116 (Figure 1A). In humans, we identified nuclear localization of TAp73 in EDs and FTs (Figure 1B-  
117 E). In mice, TAp73 expression was detected in ependymal and CP epithelial cells (Figure 1 F  
118 and G). During development, proliferative progenitors (KI-67<sup>+</sup>) are present in hindbrain roof plate,  
119 whereas post-mitotic cells expressing Aquaporin 1 (AQP1) are detected in CP epithelium (KI-67<sup>-</sup>/  
120 AQP1<sup>+</sup>) (Figure 1H). Notably, a portion of the roof plate exists between the progenitors and CP  
121 epithelium that remains undifferentiated after cell cycle exit (KI-67<sup>-</sup>/AQP1<sup>-</sup>) (Figure 1H). In  
122 contrast to progenitors with solitary primary cilium, the “transition” zone is comprised of MCCs  
123 that exhibit p73 expression at day E14.5 (Figure 1I). Altogether, these data suggest a role for  
124 TAp73 in multiciliogenesis in reproductive tracts and the brain.

125

126

127

128

129

Wildung et al. Fig. 1

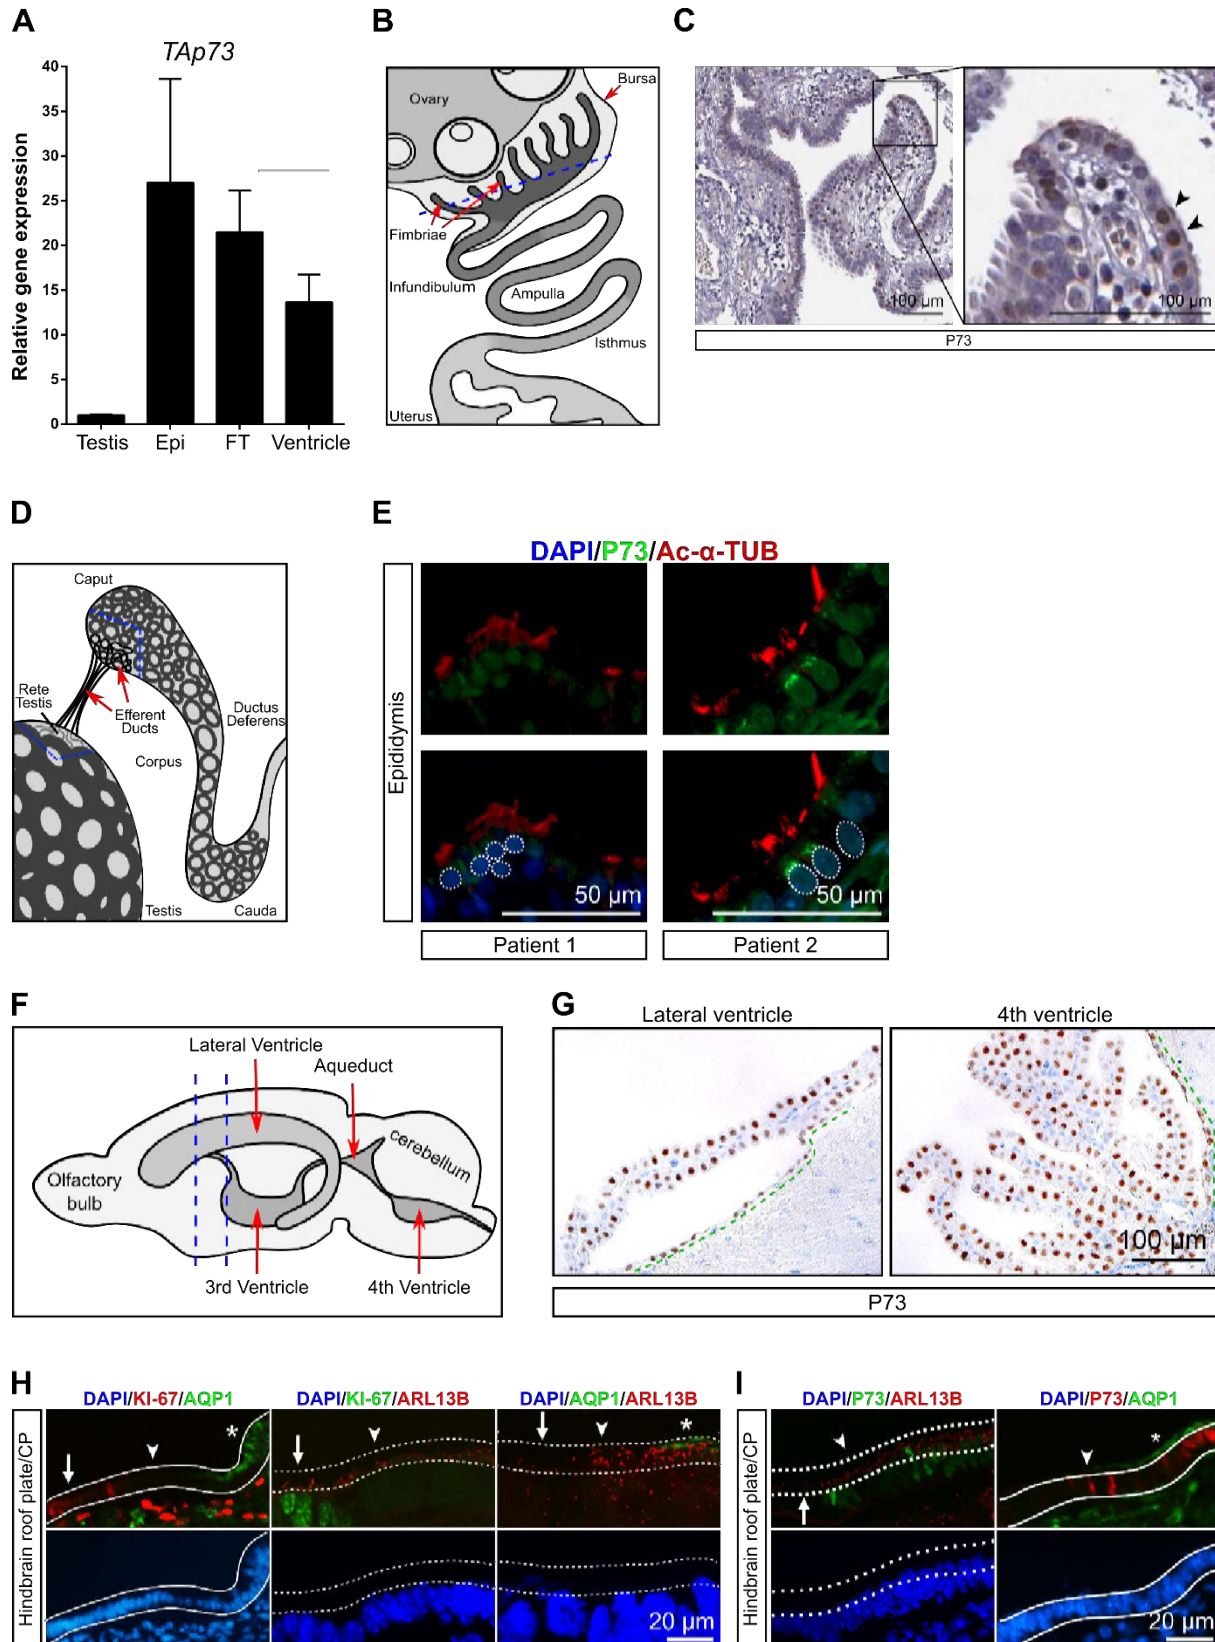

131  
132  
133  
134  
135  
136  
137  
138  
139  
140  
141  
142  
143  
144  
145  
146  
147  
148  
149  
150  
151  
152  
153  
154  
155  
156  
157  
158  
159  
160  
161  
162  
163  
164  
165  
166  
167  
168  
169  
170  
171  
172  
173  
174  
175

**Legend to Figure 1.** TAp73 is expressed in diverse multiciliated epithelial cells. **(A)** Quantitative reverse transcription PCR (RT-qPCR) analysis of *TAp73* expression in the testis, epididymis (Epi), fallopian tube (FT) and brain ventricle of wild type adult mice. Expression levels relative to *TAp73* expression in testis are shown ( $n=3$ , mean  $\pm$  SEM). **(B)** Schematic illustration of fimbriae and fallopian tube that connect ovary and uterus. **(C)** The expression of P73 is shown in human fallopian tube. Boxed region (left) is shown in higher magnification (right) with P73<sup>+</sup> cells marked by arrowheads. Images were obtained from the Human Protein Atlas (<https://www.proteinatlas.org/ENSG00000078900-TP73/tissue/fallopian+tube>). **(D)** Schematic illustration of efferent ducts that connects testis and epididymis. **(E)** The expression of P73 (green) and axonemal markers acetylated alpha tubulin (Ac- $\alpha$ -TUB, red) is shown in human efferent ducts. White bracket circles delineate P73 nuclear staining in merged pictures. DAPI staining (blue) marks nuclei. **(F)** Schematic illustration of murine brain with different ventricles marked by arrows. Blue dotted lines illustrate coronal plane used for brain slices. **(G)** The expression of TAp73 is shown in lateral and 4<sup>th</sup> ventricles of wild type adult mice. Notice that both ependymal and choroid plexus (CP) cells express TAp73. Green dotted lines demarcate ventricles lined with ependymal cells. **(H)** The expression of KI-67, Aquaporin (AQP1, green), and ARL13B (red) in wild type hindbrain roof plate/CP at embryonic (E) day E14.5. Notice that KI-67<sup>+</sup> roof plate progenitors, and AQP1<sup>+</sup> CP epithelial cells are spatially separated. ARL13B labels monociliated roof plate progenitors and multiciliated CP epithelial cells. White lines demarcate roof plate epithelium (KI-67<sup>+</sup>/AQP1<sup>-</sup>, arrows), CP epithelium (KI-67<sup>-</sup>/AQP1<sup>+</sup>, asterisks), and “transition zone” (KI-67<sup>-</sup>/AQP1<sup>-</sup>, arrowheads) in which MCCs appear. Dotted lines mark apical surface with cilia. DAPI staining (blue) labels nuclei. **(I)** Expression of TAp73, AQP1 (green), and ARL13B (red) in wild type hindbrain roof plate/CP at day E14.5. Dotted lines mark apical surface of roof plate (TAp73<sup>-</sup>, arrow) and transition zone (TAp73<sup>+</sup>, arrowhead). White lines mark transition zone (TAp73<sup>+</sup>/AQP1<sup>-</sup>, arrowhead) and CP epithelium (TAp73<sup>+</sup>/AQP1<sup>+</sup>, asterisk). DAPI staining (blue) labels nuclei.

176 ***TAp73* is crucial for the molecular circuit of multiciliogenesis in efferent ducts**

177

178 Loss of *TAp73* leads to male infertility that has been attributed to defective spermatocyte  
179 production (Holembowski et al., 2014; Inoue et al., 2014). However, flagellated and motile  
180 spermatocytes are present in *TAp73*<sup>-/-</sup> mice, though at markedly reduced levels (**Figure 2A;**  
181 **Figure 2–video supplement 1A-D**), suggesting that additional defects as a result of *TAp73* loss  
182 may contribute to infertility in these mice. The multiciliated epithelium of the ED is involved in  
183 gamete transport from the testis to the epididymis, sperm concentration and maturation (Hess,  
184 2002; Ilio & Hess, 1994), all essential aspects of male fertility (Dacheux & Dacheux, 2013).  
185 Indeed, though no gross morphological differences were observed in EDs between control and  
186 *TAp73* knockout (KO) animals (**Figure 2B**), staining of the cilia components acetylated alpha-  
187 tubulin (Ac- $\alpha$ -TUB) and axonemal dynein DNAI1 revealed a dramatic reduction in the number and  
188 length of cilia in the ED of mutant mice (**Figure 2C and D**), resembling the loss of airway cilia in  
189 these mice. ChIP followed by quantitative PCR (ChIP-qPCR) revealed significant enrichment of  
190 *TAp73* in genomic loci of *FOXJ1*, axonemal dyneins *DNALI1* and *DNAI1* (**Figure 2E**; ChIPseq  
191 track depicted in **Figure 2–figure supplement 1**). Accordingly, the expression of *Dnali1* and  
192 *Dnai1*, as well as *Foxj1* and *Rfx2/3* was reduced or almost completely lost in *TAp73* KO animals  
193 (**Figure 2F-H**). Together, our results indicate that *TAp73* directs *Dnali1* and *Dnai1* in addition to  
194 known critical nodes including *Foxj1*, *Rfx2* and *Rfx3* in EDs.

Wildung et al. Fig. 2

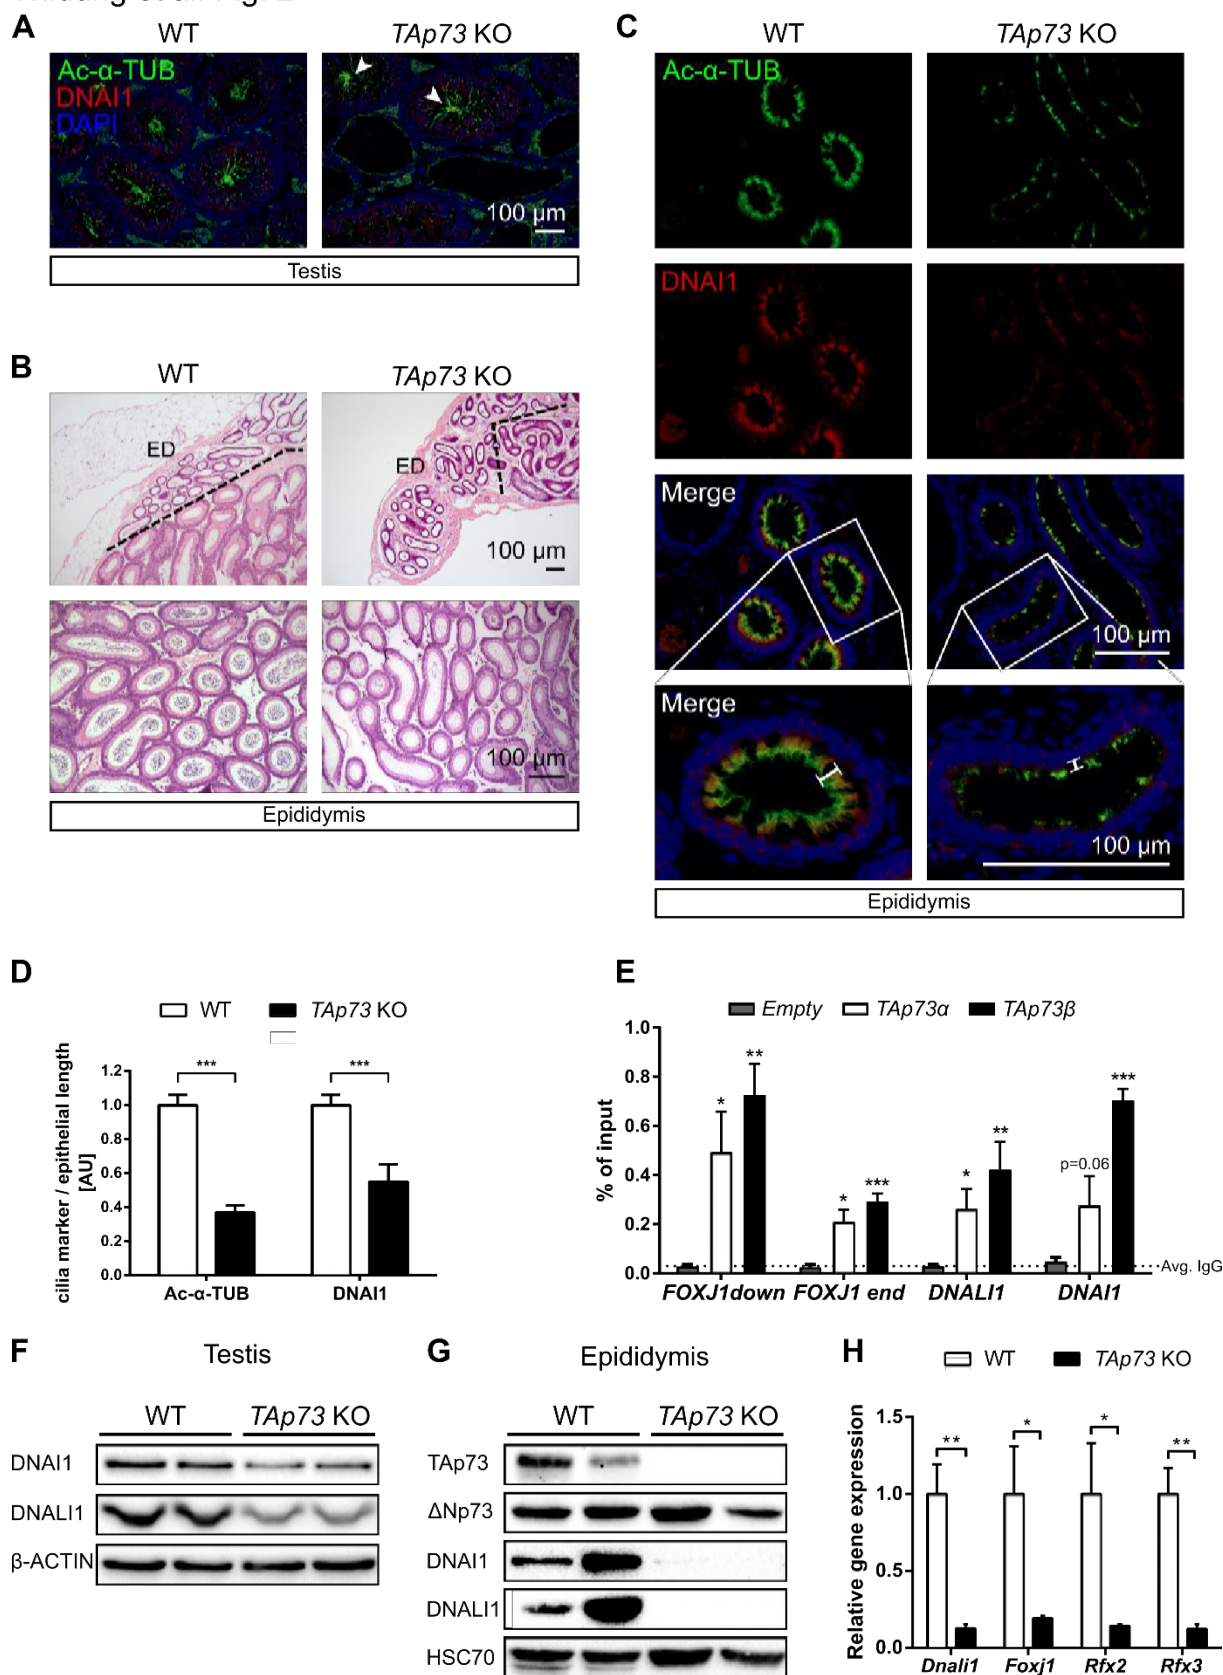

196 **Legend to Figure 2.** TAp73 controls motile multiciliogenesis in male reproductive tract. **(A)**  
197 Representative images of the expression of Ac- $\alpha$ -TUB (green) and DNAI1 (red) are shown in  
198 testis of wild type (WT) and *TAp73* knockout (KO) mice. DAPI staining (blue) labels nuclei. Notice  
199 the presence of flagellated spermatocytes in *TAp73* KO testis. **(B)** Representative images of  
200 hematoxylin and eosin (H&E) staining of epididymis sections in WT and *TAp73* KO animals.  
201 Bracket lines demarcate the border of efferent duct (ED) and epididymis magnified in lower panel.  
202 Notice that *TAp73* KO mice lack mature spermatocytes in distal epididymis. **(C)** Representative  
203 images of the expression of Ac- $\alpha$ -TUB (green) and DNAI1 (red) are shown in efferent ducts of  
204 WT and *TAp73* KO mice. DAPI staining (blue) labels nuclei. Boxed regions are magnified illustrate  
205 cilia length (white bars). **(D)** Quantitation of Ac- $\alpha$ -TUB and DNAI1 signals normalized to epithelial  
206 length shown in **(C)** ( $n=6$  images from 3 WT mice;  $n=11$  images from 4 *TAp73* KO mice). **(E)**  
207 Chromatin immunoprecipitation was performed for Saos2 cells transfected with TAp73 $\alpha$ , TAp73 $\beta$ ,  
208 and control empty vector. Binding of TAp73 $\alpha$  (white bars) and TAp73 $\beta$  (black bars) to genomic  
209 regions of *FOXJ1*, *DNALI1* and *DNAI1* is compared with that of control vector (grey bars) using  
210 targeted quantitative PCR ( $n=3$  for each antibody/gene pair shown, mean  $\pm$  SEM, Genomic  
211 regions examined are illustrated in Figure 2 - Figure supplement 1 (Koeppel et al., 2011).  
212 Immunoblot analysis of the expression of axonemal dyneins DNALI1 and DNAI1, TAp73, and P73  
213 isoform lacking N-terminal ( $\Delta$ Np73) in testis **(F)** and epididymis **(G)** of WT and *TAp73* KO animals.  
214  $\beta$ -actin **(F)** and Heat shock cognate 71 kDa protein (HSC70, **G**) serve as a loading control. **(H)**  
215 RT-qPCR analysis of *Dnali1*, *Foxj1* and *Rfx2* and *Rfx3* expression in efferent ducts from WT  
216 (empty bars) and *TAp73* KO (black bars) mice ( $n=3$  samples/genotype, mean  $\pm$  SEM).  
217



Wildung et al. Fig. 2 - Figure supplement 1

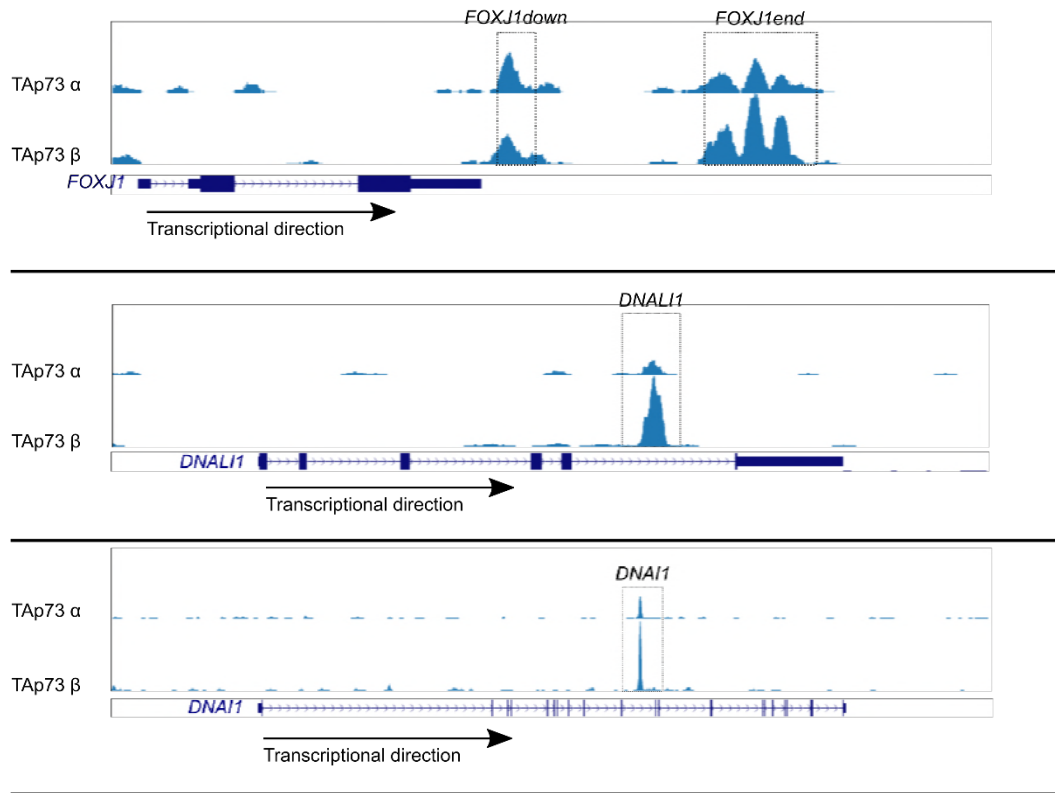

218

219 **Legend to Figure 2–figure supplement 1.** TAp73 is associated with ciliary genes expressed in  
220 male and female reproductive tracts. TAp73 binding at *FOXJ1*, *DNALI1* and *DNAI1* genomic loci  
221 is shown in results from ChIPseq (Koeppl et al., 2011), Geo accession no. **GSE15780**. Boxed  
222 regions mark genomic loci enriched with TAp73 binding and validated by quantitative PCR  
223 following ChIP (ChIP-qPCR) in **Figure 2E**.

224

225

226 **TAp73-driven network of transcription factors regulates multiciliogenesis in fallopian**  
227 **tubes**

228

229 Though female infertility associated with the loss of *TAp73* is thought to arise from the failure of  
230 oocytes release from the ovary and progression along FTs (Tomasini et al., 2008) (**Figure 1B**), it  
231 remained unclear how *TAp73* loss affects the gamete transport. To address this, we examined  
232 the FTs of *TAp73* KO animals and found a profound reduction in cilia coverage in oviduct  
233 epithelium despite normal tubal morphology (**Figure 3A and B**). Similar to observations in *TAp73*  
234 <sup>-/-</sup> EDs, protein products of genes bound by TAp73 (**Figure 2E**) *FOXJ1*, *DNAI1* and *DNALI1* (all  
235 expressed in the human FTs, cf. **Figure 3–figure supplement 1**) and transcript products of  
236 *Dnali1*, *Foxj1*, *Rfx2* and *Rfx3* were significantly reduced in *TAp73*<sup>-/-</sup> FTs (**Figure 3C and 3D**  
237 **respectively**), consistent with loss of TAp73-driven multiciliogenesis program. Further evaluation

238 of smooth muscle contraction pattern in FTs revealed no difference between control and TAp73  
 239 KO animals (**Figure 3–video supplement 1A and B**). Therefore, these data indicate that loss of  
 240 TAp73 leads to reduced multiciliogenesis in the oviduct that may cause defective oocyte transport  
 241 (Tomasini et al., 2008).

242  
 243  
 244

Wildung et al. Fig. 3

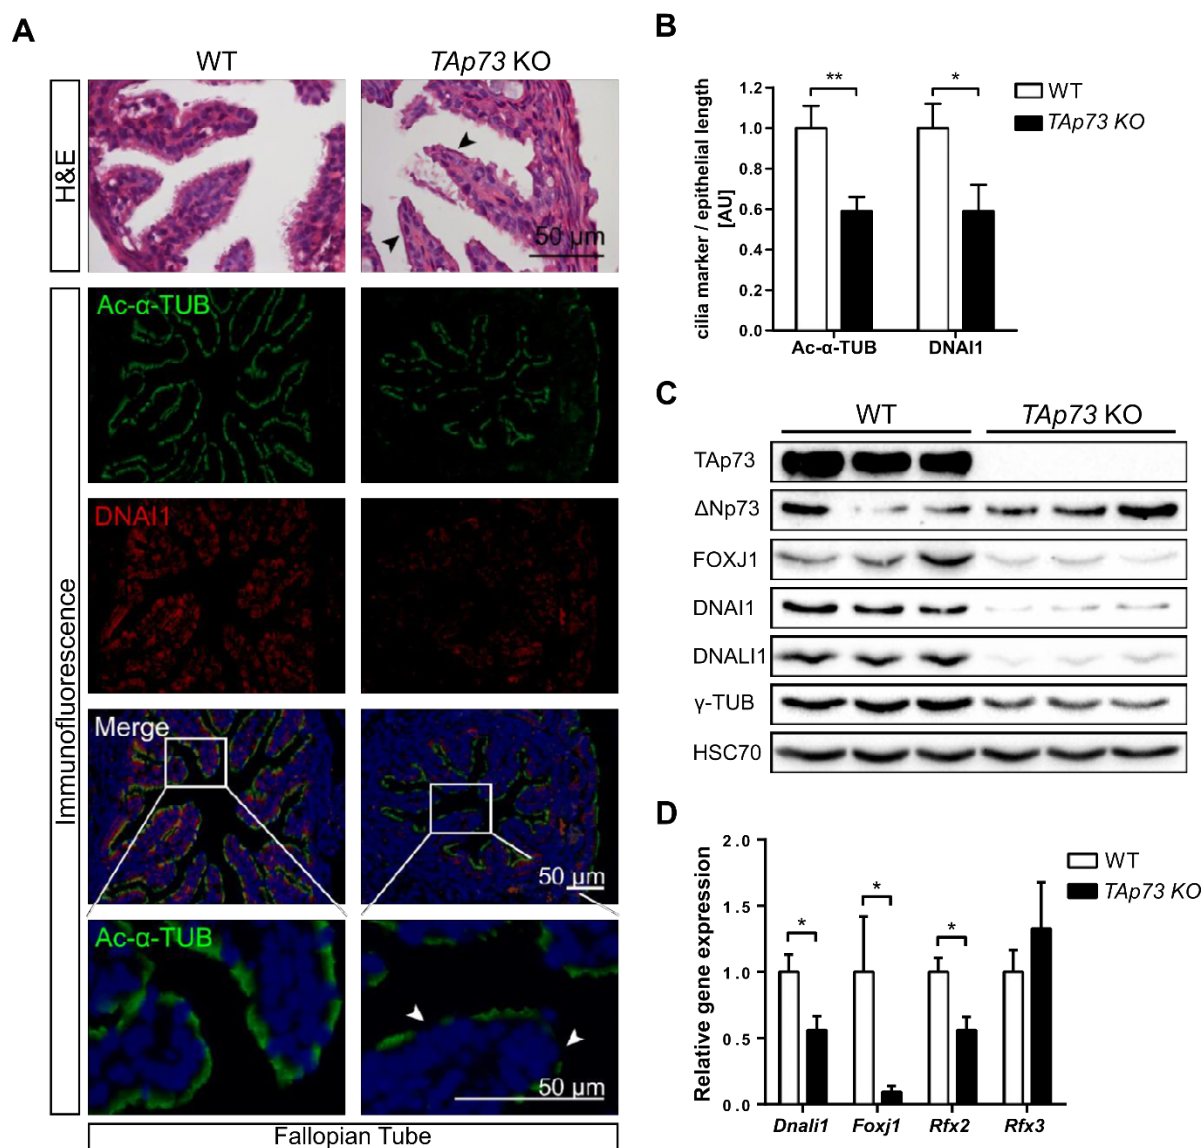

246 **Legend to Figure 3.** TAp73 controls motile multiciliogenesis in oviduct. (A) Representative  
 247 images of H&E staining of fallopian tube are shown in WT and TAp73 KO animals (upper panel).  
 248 The expression of Ac-α-TUB (green) and DNAI1 (red) is shown in fallopian tube of WT and TAp73  
 249 KO mice (lower panels). Boxed regions are magnified (lower panel). Arrowheads illustrate non-  
 250 ciliated segments of fallopian tube of TAp73 KO mice. DAPI staining (blue) labels nuclei. (B)  
 251 Quantitation of Ac-α-TUB and DNAI1 signals shown in (A) and normalized to epithelial length

252 ( $n=9$  images from 4 WT mice;  $n=7$  images from 3 *TAp73* KO mice, mean  $\pm$  SEM). (C) Immunoblot  
253 analysis of the expression of DNALI1, DNAI1, gamma tubulin ( $\gamma$ -TUB), FOXJ1, TAp73, and  
254  $\Delta$ Np73 in oviducts from WT and *TAp73* KO animals. HSC70 serve as a loading control. (D) RT-  
255 qPCR analysis of *Dnali1*, *Foxj1* *Rfx2* and *Rfx3* expression in oviducts from WT (empty bars) and  
256 *TAp73* KO (black bars) mice ( $n=3$  samples/genotype, mean  $\pm$  SEM).

257 Note: *Rfx3* primers do not span an intron and could thus theoretically amplify genomic sequence.

258

Wildung et al. Fig. 3 - Figure supplement 1

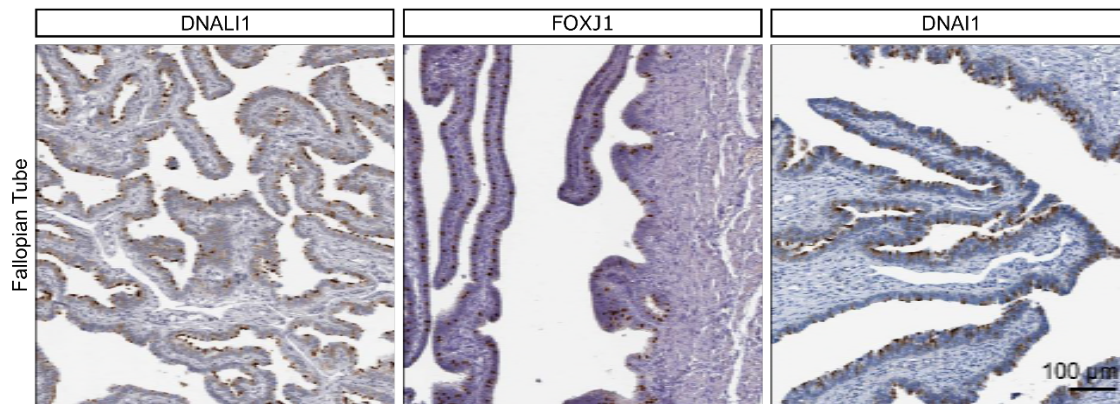

259

260

261 **Legend to Figure 3–figure supplement 1.** Human FT epithelia express DNALI1, FOXJ1 and  
262 DNAI1. Images retrieved from the Human Protein Atlas (DNALI1:  
263 <http://www.proteinatlas.org/ENSG00000163879-DNALI1/tissue/fallopian+tube>, FOXJ1:  
264 <http://www.proteinatlas.org/ENSG00000129654-FOXJ1/tissue/fallopian+tube>, DNAI1:  
265 <http://www.proteinatlas.org/ENSG00000122735-DNAI1/tissue/fallopian+tube>).

266

267

268

269

270

271

272

273

274

275

276

277

278

279 **Multiciliogenesis in the brain is unaltered in the absence of *TAp73***

280

281 The expression of *TAp73* in ependymal and CP epithelial cells (**Figure 1F-H**), along with recent  
282 studies suggesting the role of *MCIDAS/E2F4* in multiciliogenesis of these cells (Kyrousi, Lalioti,  
283 Skavatsou, Lygerou, & Taraviras, 2016; Ma et al., 2014; Mori et al., 2017), led us to examine the  
284 role of *TAp73* in MCCs in the brain. Morphological and gene expression studies revealed no  
285 apparent defect in ependymal cells and the CP in *TAp73* KO brains and confirmed lack of P73  
286 expression (**Figure 4A and B**). We performed staining for Ac- $\alpha$ -TUB and DNAI1, and cilia marker  
287 ADP-ribosylation factor-like 13b (*ARL13B*; (Caspary, Larkins, & Anderson, 2007) in lateral and 4<sup>th</sup>  
288 ventricles. In contrast to FT and EDs, our results showed that the number and length of cilia from  
289 ependymal and CP cells in *TAp73*<sup>-/-</sup> animals are similar to those of control animals (**Figure 4C,**  
290 **E; Figure 4-figure supplement 1A and B**). Consistently, ciliary beating and bead flow in  
291 cerebrospinal fluid appeared unaffected by *TAp73* KO (**Figure 4D; Figure 4-video supplement**  
292 **1A and B**). Furthermore, no significant difference was observed in the expression of markers for  
293 epithelial differentiation of CP between control and *TAp73*<sup>-/-</sup> animals (**Figure 4-figure**  
294 **supplement 1C-F**). RT-qPCR analysis demonstrated comparable expression of *Dnali1* and *Foxj1*  
295 whereas increased *Rfx2* and *Rfx3* mRNA levels were observed in brain ventricles of *TAp73* KO  
296 mice (**Figure 4F**). Taken together, these results indicate that multiciliogenesis in the brain remains  
297 intact despite the loss of *TAp73*.

Wildung et al. Fig. 4

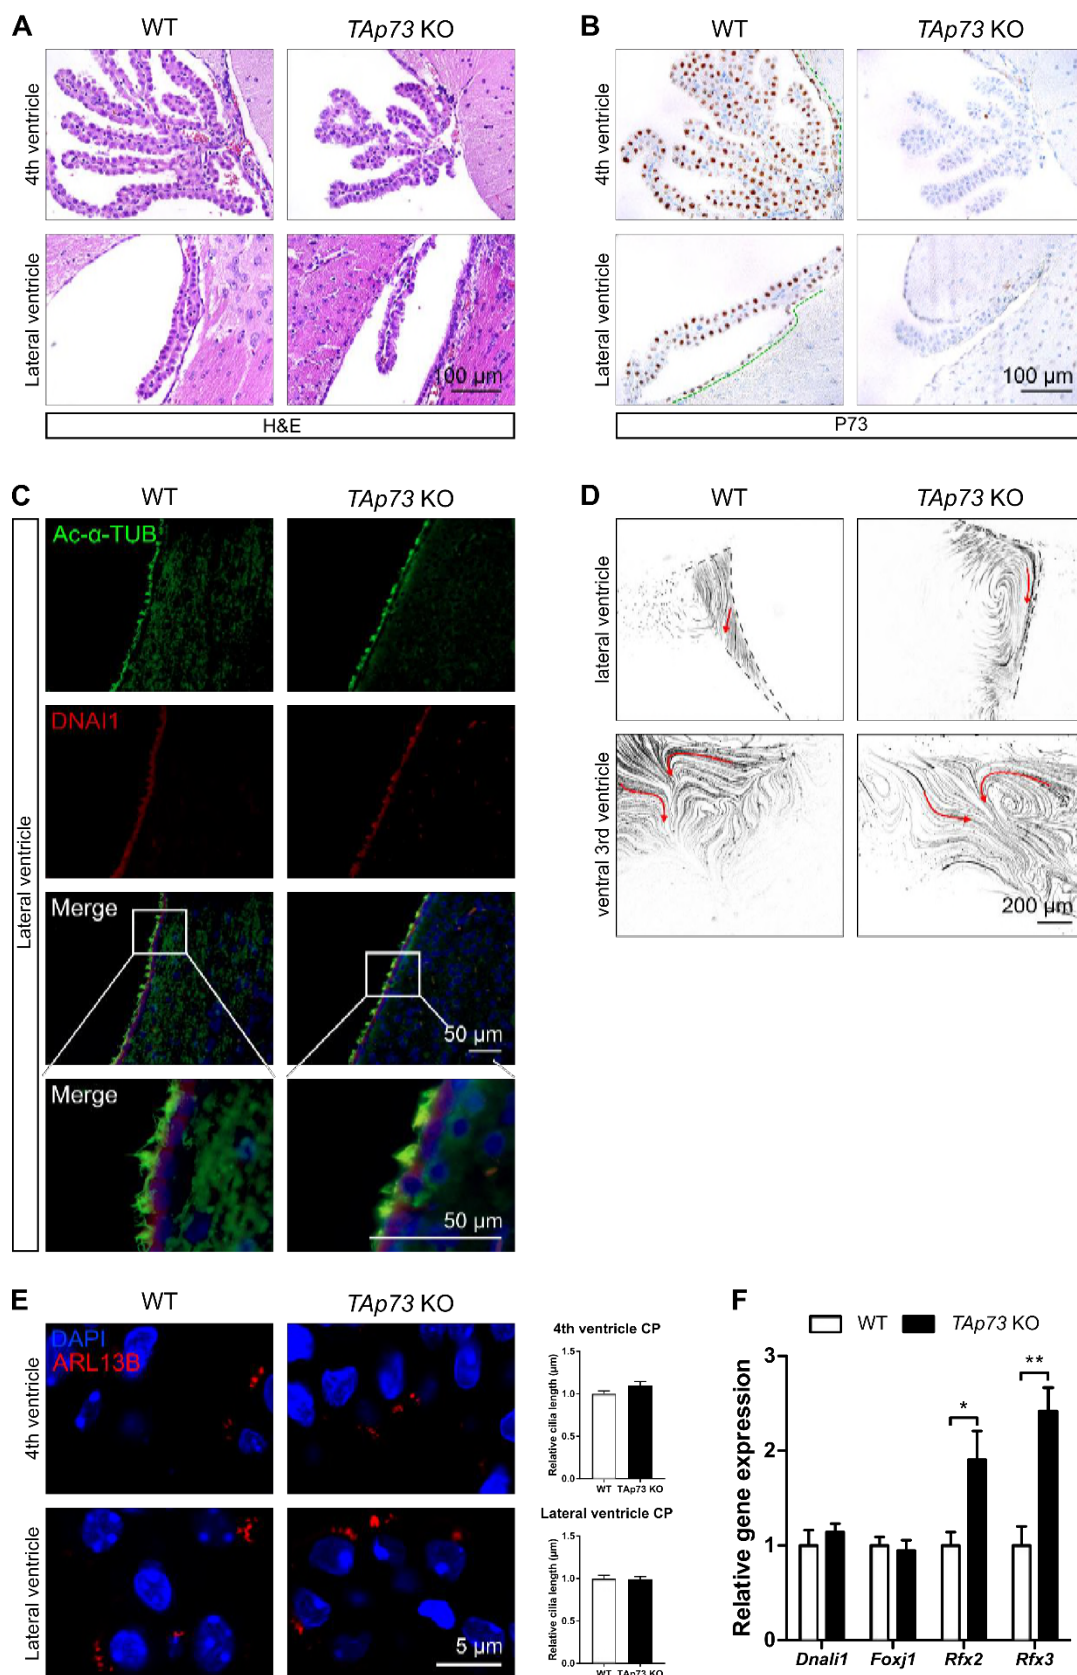

299 **Legend to Figure 4.** *TAp73* is dispensable for brain multi-ciliogenesis. **(A)** Representative H&E  
300 staining images are shown of ependymal and CP epithelial cells in hindbrain and lateral ventricle  
301 from WT and *TAp73* KO animals. **(B)** The expression of *TAp73* is shown in ependymal and CP  
302 epithelial cells shown in **(A)**. Notice that *TAp73* expression is lost in these cells in *TAp73* KO mice.  
303 Green dotted lines mark demarcate ventricles lined with ependymal cells.**(C)** Representative  
304 images of the expression of Ac- $\alpha$ -TUB (green) and DNAI1 (red) in ependymal cells in lateral  
305 ventricle from WT and *TAp73* KO animals shown in **(A)**. DAPI staining (blue) labels nuclei. Boxed  
306 regions are magnified to illustrate cilia on cell surface. **(D)** Quantitation of the movement of  
307 fluorescent beads along the ventricular system. Images of maximum intensity projections of  
308 representative movies of the lateral and the ventral 3<sup>rd</sup> ventricles are shown ( $n=3$  for *TAp73*<sup>-/-</sup> mice;  
309  $n=1$  for *TAp73*<sup>+/-</sup> mice; and  $n=2$  for WT mice). Red arrows mark the direction of bead flow. Bracket  
310 lines depict ependymal layer lining the ventricles. Refer to **Figure 4– Video supplement 1A-B**  
311 for examples of recording of ciliary beating. **(E)** The expression of cilia marker ARL13B (red) is  
312 shown in CP epithelial cells shown in **(A)**. DAPI staining (blue) labels nuclei. Graphs show  
313 quantitation of average cilia length in CP epithelial cells shown in upper and lower panels. **(F)** RT-  
314 qPCR analysis of *Dnali1*, *Foxj1* and *Rfx2/3* expression in brain ventricles from wild type (empty  
315 bars) and *TAp73* KO (black bars) mice ( $n=3$  samples/genotype, mean  $\pm$  SEM).  
316

317 *Note: Rfx3 primers do not span an intron and could thus theoretically amplify genomic sequence.*  
318

Wildung et al. Fig. 4 - Figure supplement 1

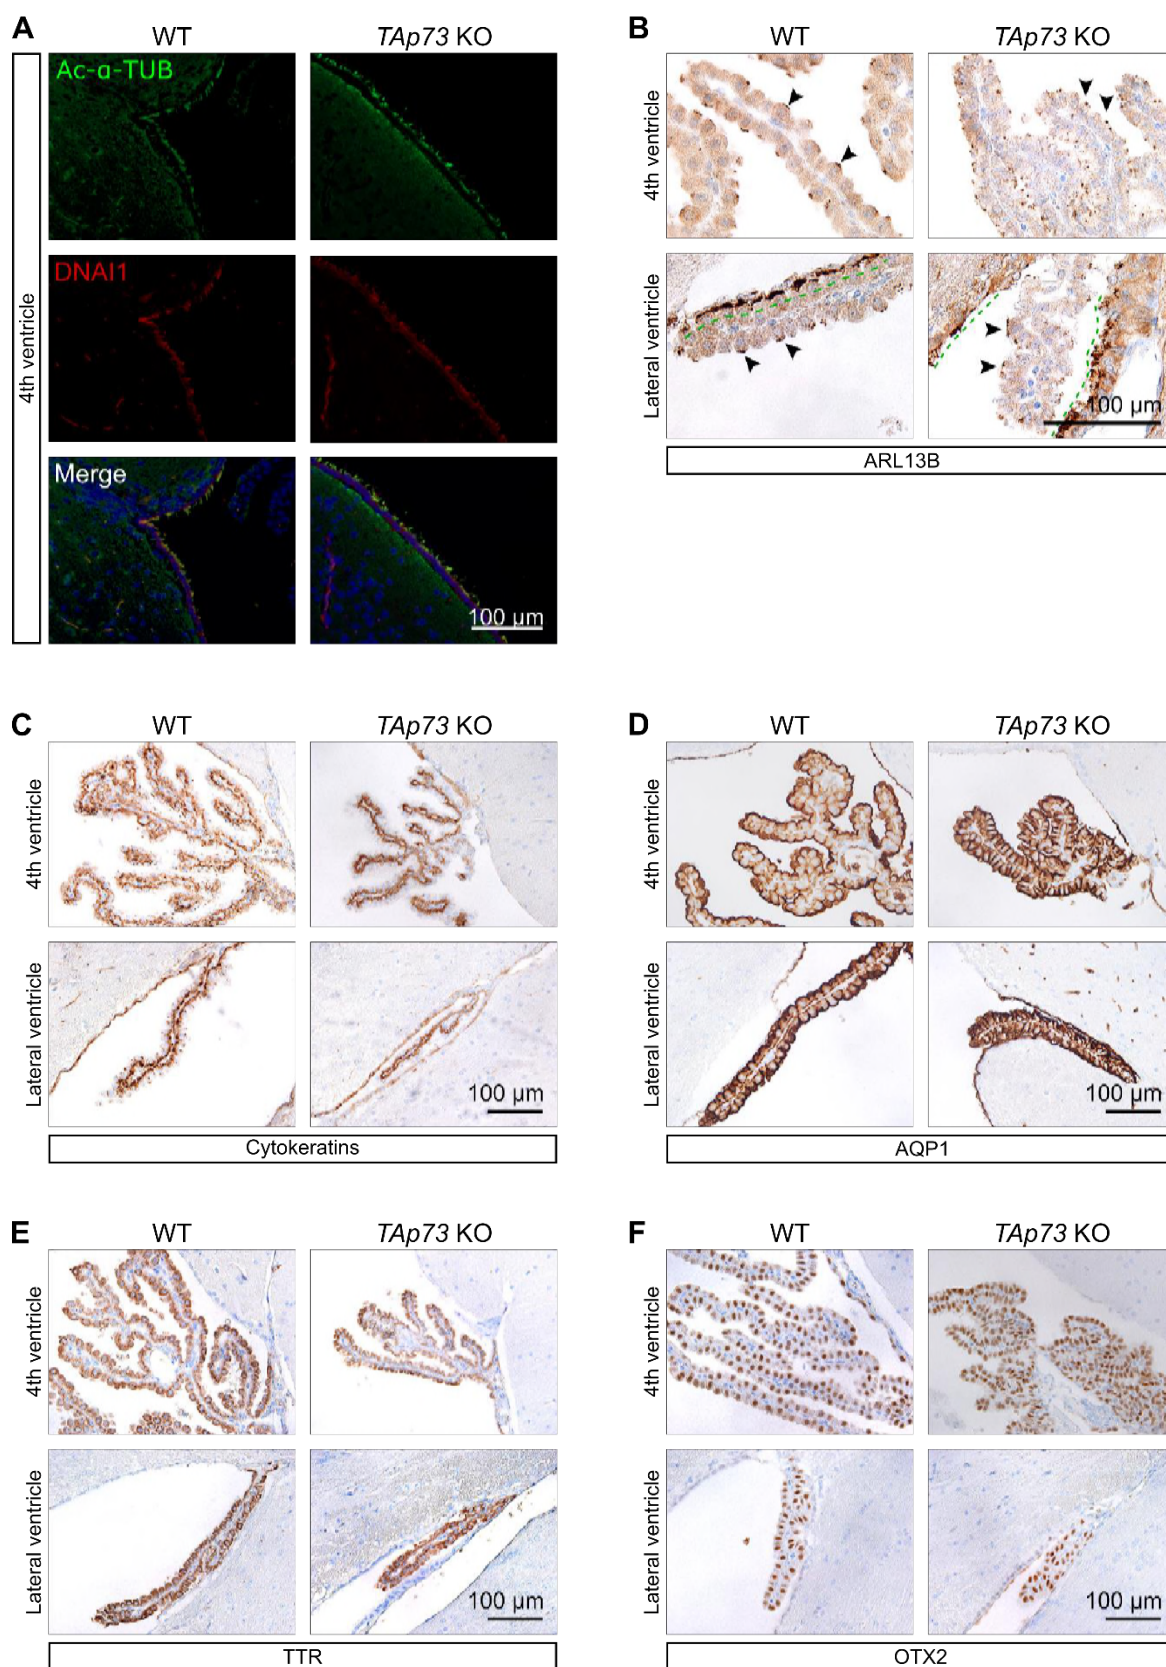

320 **Legend to Figure 4–figure supplement 1.** *TAp73* is dispensable for multiciliogenesis in the  
321 brain. (A) The expression of Ac- $\alpha$ -TUB (green) and DNAI1 (red) is shown in ependymal cells of  
322 the 4<sup>th</sup> ventricle from WT and *TAp73* KO animals. Representative images of the expression of  
323 ARL13B (B), cytokeratins (C), AQP1 (D), transthyretin (TTR, E), and Orthodenticle homeobox 2  
324 (OTX2, F) are shown in CP epithelium of the 4<sup>th</sup> and lateral ventricles from WT and *TAp73* KO  
325 animals. Red dotted lines mark the boundary of lateral ventricles lined with ependymal cells.

326  
327

## 328 **TAp73 functions through posttranscriptional codes in brain multiciliogenesis**

329  
330 Besides transcription factors, *TAp73* utilizes posttranscriptional mechanisms involving micro  
331 RNAs. Consistently, sequencing of small RNA species from brain ventricles revealed significant  
332 reduction in *miR34bc* (Figure 5A; complete small RNA sequencing results in Figure 5–table  
333 supplement 1 and in GEO under accession number GSE108385), reminiscent of findings in  
334 *TAp73*<sup>-/-</sup> airways. Remarkably, our analysis also revealed a strong induction of microRNA cluster  
335 *miR449* (Figure 5A; Figure 5–table supplement 1; GSE108385), that together with *miR34bc*  
336 regulates multiciliogenesis in different tissues across species (Lizé, Herr, Klimke, Bals, &  
337 Dobbelstein, 2010; Marcet, Chevalier, Luxardi, et al., 2011; Marcet, Chevalier, Coraux,  
338 Kodjabachian, & Barbry, 2011; Song et al., 2014). In agreement, *miR449* is predominantly  
339 expressed in the CP, and increases significantly by over 10-fold upon *TAp73* loss in ventricles  
340 (Figure 5B and C) but not in FT nor ED preparations (Figure 5–figure supplement 1)  
341 (Redshaw, Wheeler, Hajihosseini, & Dalmay, 2009).

342  
343 *miR449* is known to suppress the NOTCH pathway, thereby activating the transcriptional cascade  
344 involving MCIDAS/E2Fs (Boon et al., 2014; Kyrousi et al., 2016; Marcet, Chevalier, Luxardi, et  
345 al., 2011; Stubbs et al., 2012; Terré et al., 2016). Though only a slight and non-significant increase  
346 in the expression of *Mcidas* was observed in brain ventricles after *TAp73* loss, the expression of  
347 *E2f4* in brain ventricles was significantly increased in *TAp73* KO mice compared to control animals  
348 (Figure 5C). Previous reports showed that *miR449* can be activated by E2F1 (Lizé, Pilarski, &  
349 Dobbelstein, 2010; X. Yang et al., 2009). Given the conserved binding motif of the E2F  
350 transcription factors, we isolated *miR449* genomic region (*miR449* is embedded in *CDC20B* gene)  
351 with putative E2F binding sites to assess interaction with MCIDAS/E2F4 in luciferase reporter  
352 assay. Indeed, *MCIDAS* alone or in combination with *E2F4* elicited strong transcriptional response  
353 from *miR449* locus, a reaction almost completely abolished by mutating the strongest of the three  
354 putative E2F binding sites (Figure 5D and materials and methods Table 5). This suggests that  
355 increased MCIDAS/E2F4 activity stimulates *miR449* expression in *TAp73* KO brain ventricles.

356



Wildung et al. Fig. 5

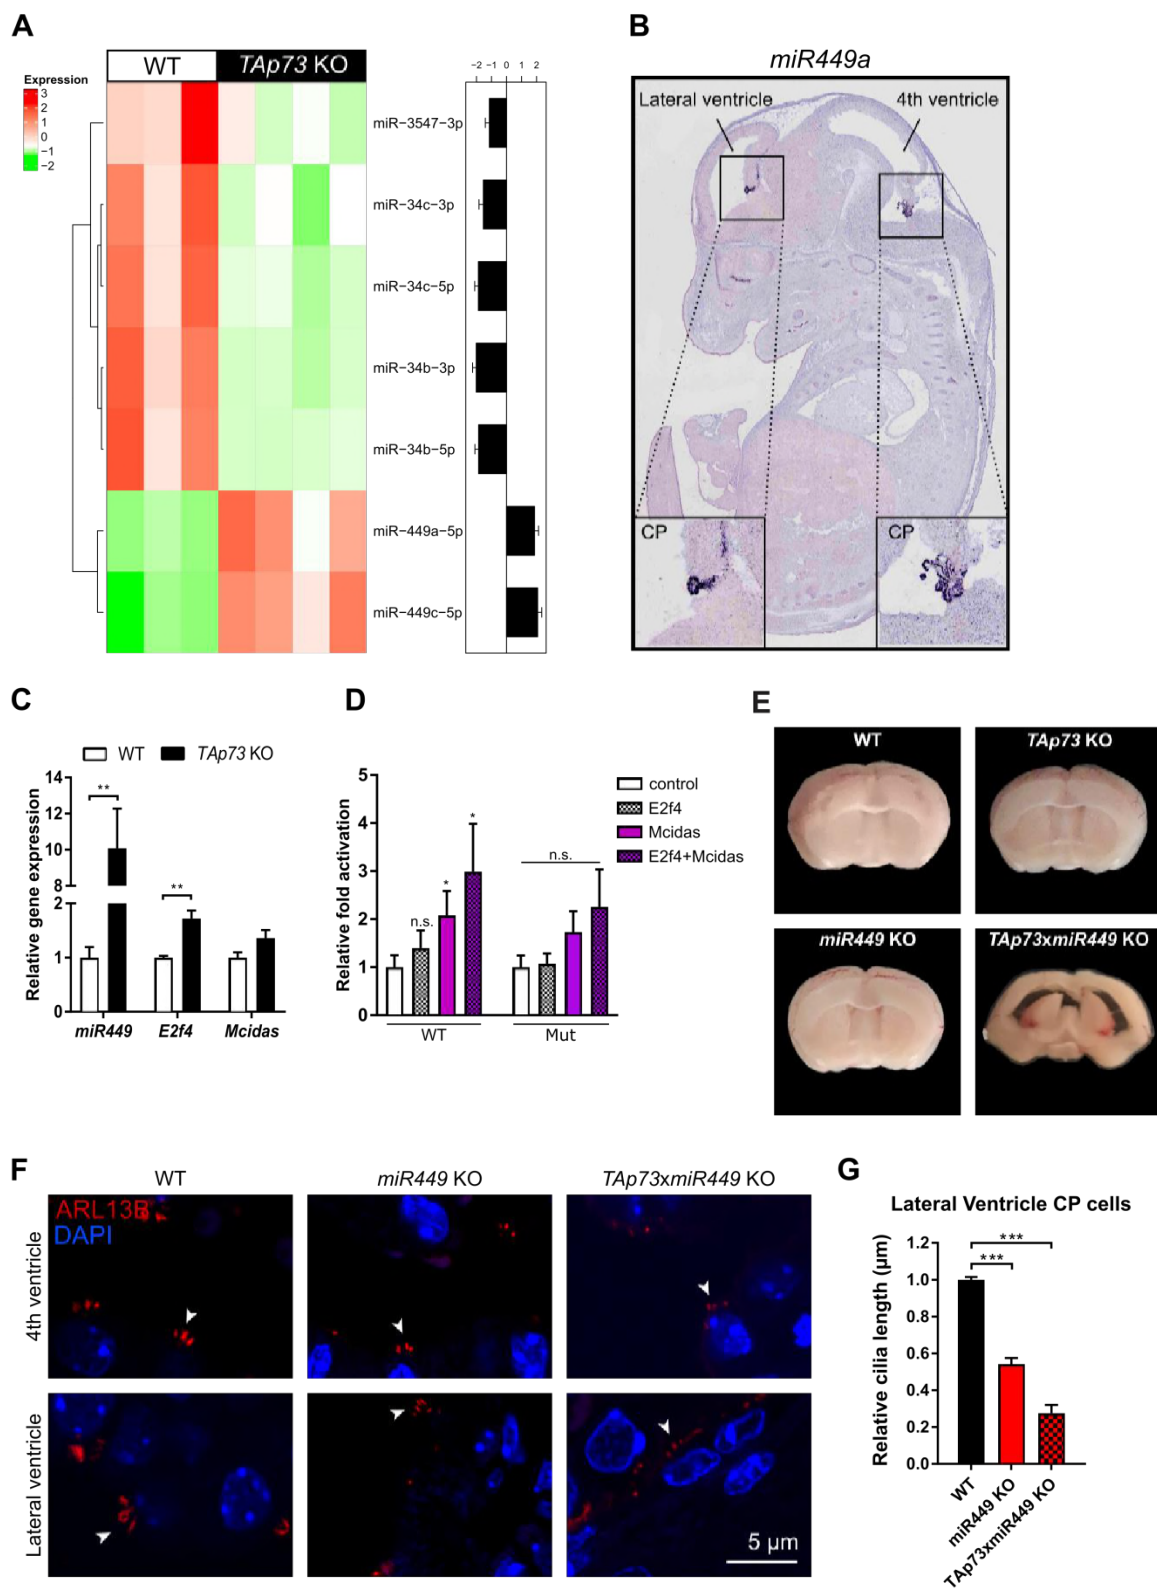

357  
358

359 **Legend to Figure 5.** TAp73 functions through *mir-34/449* family in brain multiciliogenesis. (A)  
360 Hierarchical clustering of differentially expressed micro RNAs in brain ventricles between WT and  
361 TAp73 KO mice (left panel,  $n=3$  for WT mice,  $n=4$  for TAp73 KO mice, mean  $\pm$  SEM, one-way  
362 ANOVA, FDR < 0.05, fold change is shown). Expression differences are plotted as  $\log_2$  values for  
363 micro RNAs shown in heat map (right panel). Complete sRNA-seq data sets can be found in Gene  
364 Expression Omnibus (GEO) under accession number **GSE108385**. (B) *In situ* hybridization  
365 analysis of the expression of *miR449* in roof plate/CP at day E14.5  
366 (<http://www.eurexpress.org/ee/>, (Diez-Roux et al., 2011)). (C) RT-qPCR analysis of *miR449*, *E2f4*,  
367 and *Mcidas* in brain ventricles from WT (empty bars) and TAp73 KO (black bars) mice ( $n=3$   
368 samples/genotype, mean  $\pm$  SEM). (D) Luciferase assay of regulatory regions of *miR449*  
369 containing E2F binding motifs. *miR449* genomic sequences with three consensus E2F binding  
370 sites were identified (<http://jaspar.binf.ku.dk/>) and placed in front of a luciferase cassette. Deletion  
371 mutant (Mut) was created that lack the strongest consensus site but retains two milder E2F  
372 consensus sequences (**Materials and methods Table 5**). Wild type and mutant luciferase  
373 vectors were then co-transfected with empty vector (control, empty bars), or vectors expressing  
374 *E2F4* (checkered), *MCIDAS* (purple bars) or both (purple checkered bars). The results are shown  
375 as fold changes in luciferase activities relative to control vector ( $n=4$ , mean  $\pm$  SEM). (E) Coronal  
376 brain slices as depicted by blue lines in **Figure 1F** are shown from WT, TAp73 KO, *miR449* KO  
377 and TAp73/*miR449* double knockout (TAp73/*miR449* KO) mice. Note that TAp73/*miR449* KO  
378 mice display severe hydrocephalus. (F) Representative images of the expression of cilia marker  
379 ARL13B (red) are shown in CP epithelial cells of hindbrain and lateral ventricles in WT, *miR449*  
380 KO, and TAp73/*miR449* KO mice. DAPI staining (blue) labels nuclei. (G) Quantitation of average  
381 cilia length of CP epithelial cells shown in (F) ( $n=9$  images from 4 WT mice;  $n=7$  images from 3  
382 TAp73 KO mice, mean  $\pm$  SEM).  
383  
384

#### Wildung et al. Fig. 5 - Figure supplement 1

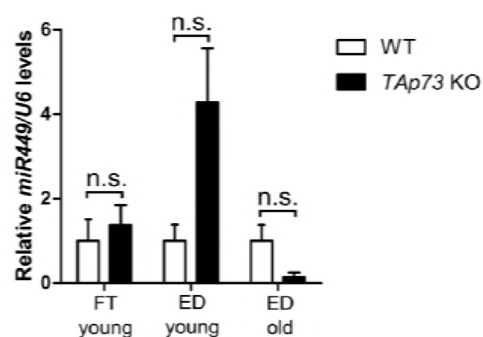

385  
386 **Legend to Figure 5—figure supplement 1.** FTs and EDs of TAp73 KO do not display significant  
387 increase in *miR449* expression.  
388 *Note: We cannot directly compare gene expression in “young” versus “old” ED cohorts due to age*  
389 *and preparation differences. However, this discrepancy fortifies the idea that, in contrast to the*  
390 *brain, there is no significant change in miR449 expression in response to TAp73<sup>-/-</sup> neither in FTs*  
391 *nor in EDs. Cohorts: FT young:  $n=4$  WT and  $n=4$  TAp73 KO; ED young:  $n=3$  WT and  $n=5$  TAp73*  
392 *KO; ED old:  $n=4$  WT and  $n=3$  TAp73 KO.*

393  
394 Our data suggests that a crosstalk between MCIDAS/E2F4 and *miR449* may partially compensate  
395 for *TAp73* loss in brain multiciliogenesis. To address this, we performed deletion of *miR449* cluster  
396 in *TAp73* mutant background. Strikingly, *TAp73<sup>-/-</sup>;miR449<sup>-/-</sup>* (aka *TAp73xmiR449* KO) mice  
397 developed severe hydrocephalus (**Figure 5E, Figure 5-figure supplement 2A**). Analysis of  
398 ARL13B expression revealed that, though *miR449* loss alone resulted in a significant decrease in  
399 the length of cilia in CP epithelial, a more pronounced reduction in cilia was observed  
400 in *TAp73xmiR449* KO mice (**Figure 5F and G; Figure 5-figure supplement 2B**). No significant  
401 difference was observed in the expression of genes normally found in CP epithelial cells among  
402 wild type, *TAp73* KO, *miR449* KO, and *TAp73xmiR449* KO animals (**Figure 5-figure**  
403 **supplement 2C-E**). Despite the role of NOTCH signaling in CP development and tumorigenesis  
404 (Bill et al., 2008; Li et al., 2016), RNAscope studies revealed similar expression of NOTCH  
405 pathway targets *Hes1* and *Hes5* in the roof plate of control, *miR449<sup>-/-</sup>* and *TAp73xmiR449* KO  
406 embryos at day E14.5 (**Figure 5-figure supplement 3**), indicating normal NOTCH pathway  
407 activity in the absence of *miR449*. Together, our data indicate that *TAp73* utilizes the unique  
408 topology of its transcriptional network to communicate with *miR-34/449* family and other crucial  
409 regulators of motile multiciliogenesis e.g. *E2F4/MCIDAS* to regulate brain ciliogenesis (**Figure 6**).  
410  
411  
412  
413  
414  
415

Wildung et al. Fig. 5 - Figure supplement 2

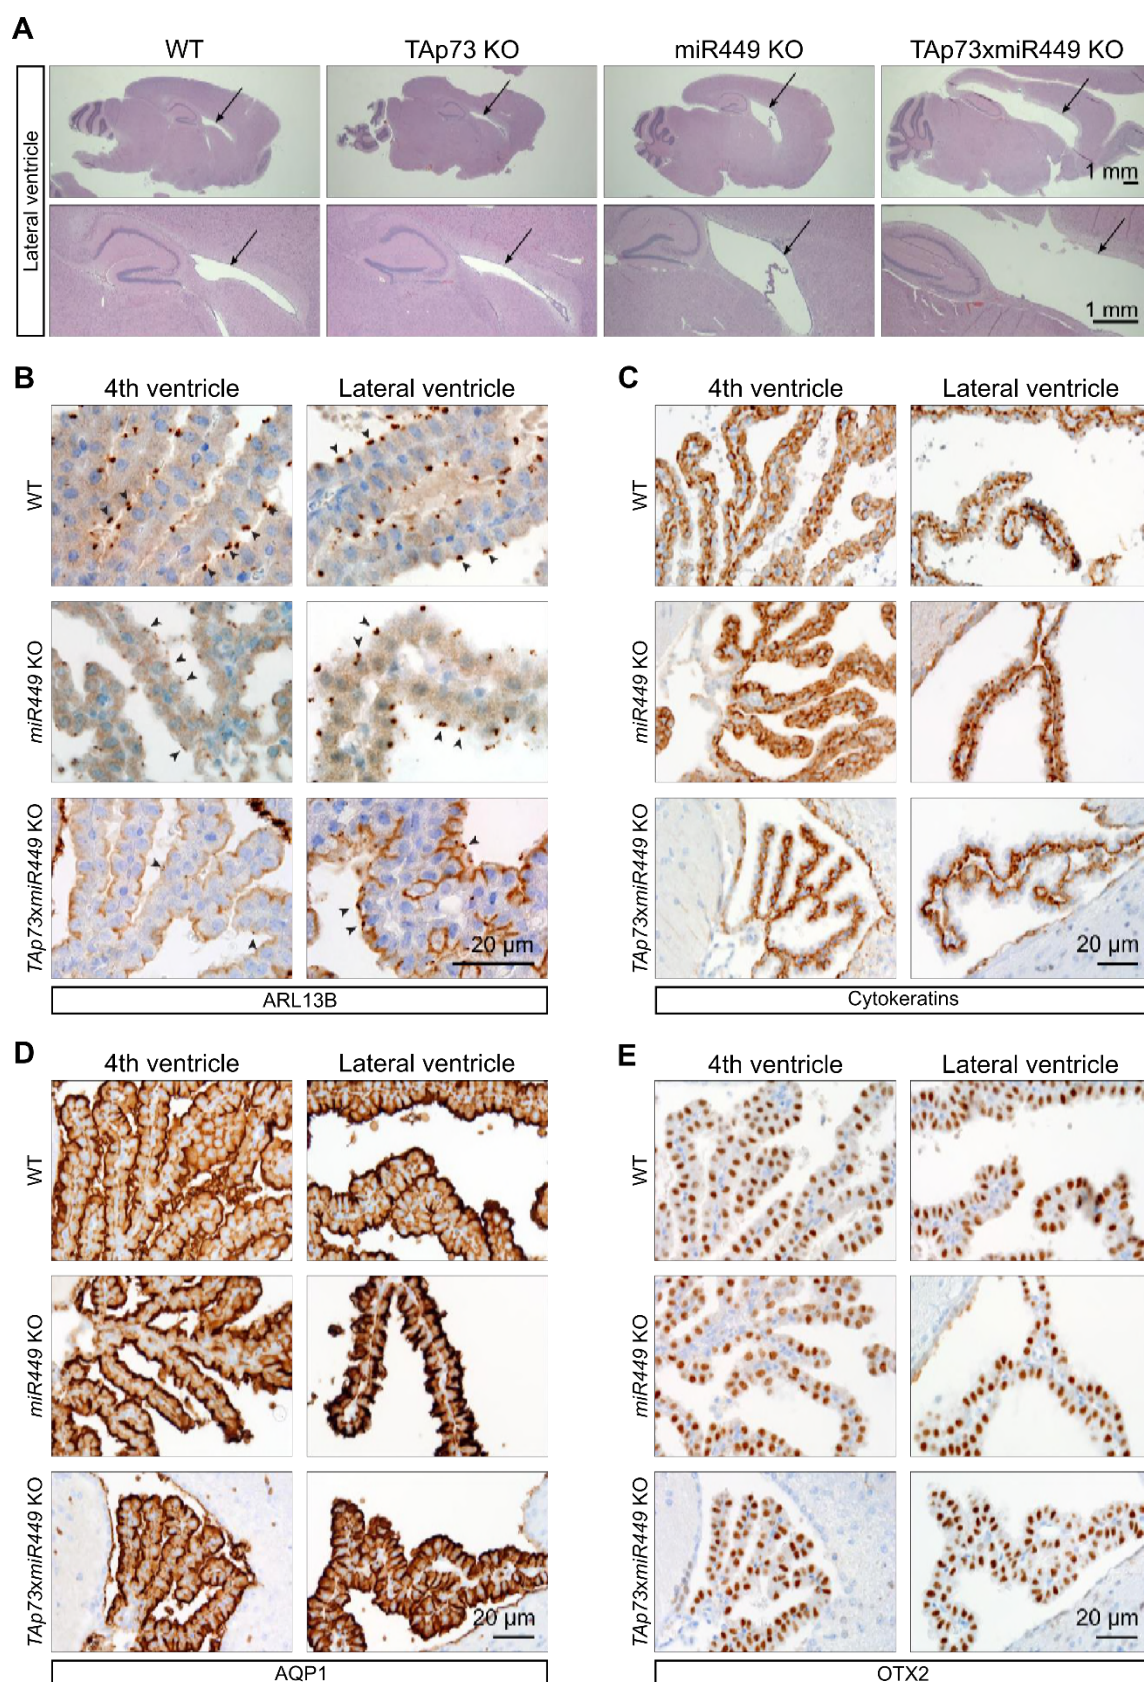

417 **Legend to Figure 5–figure supplement 2.** miR449 compensates loss of *TAp73* in brain  
418 multiciliogenesis. (A) Representative H&E stainings of WT, *TAp73* KO, *miR449* KO and  
419 *TAp73xmiR449* KO. Arrows point at ventricles, with *TAp73xmiR449* KO displaying strong  
420 hydrocephalus. Representative images of the expression of ARL13B (B) cytokeratins (C), AQP1  
421 (D), OTX2 (E) in the CP epithelium of the 4<sup>th</sup> and lateral ventricles from WT, *miR449* KO, and  
422 *TAp73xmiR449* KO mice.  
423  
424

Wildung et al. Fig. 5 - Figure supplement 3

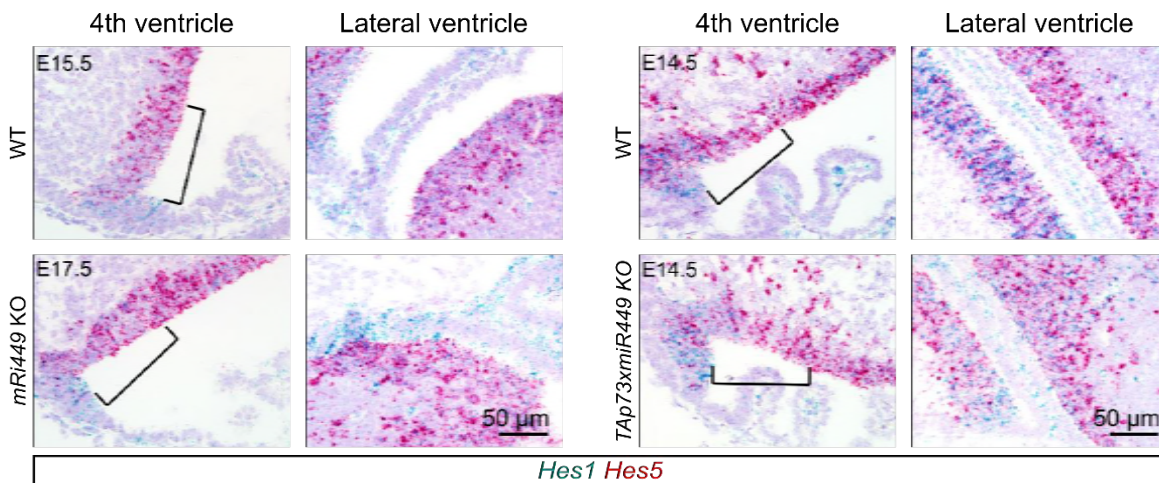

425  
426  
427 **Legend to Figure 5–figure supplement 3.** NOTCH signaling is unaltered in *miR449* KO and  
428 *TAp73xmiR449* KO developing ventricles. RNAscope analysis of the expression of NOTCH  
429 targets *Hes1* (blue) and *Hes5* (red) in 4<sup>th</sup> and lateral ventricles of WT, *miR449* KO, and  
430 *TAp73xmiR449* KO mice.  
431

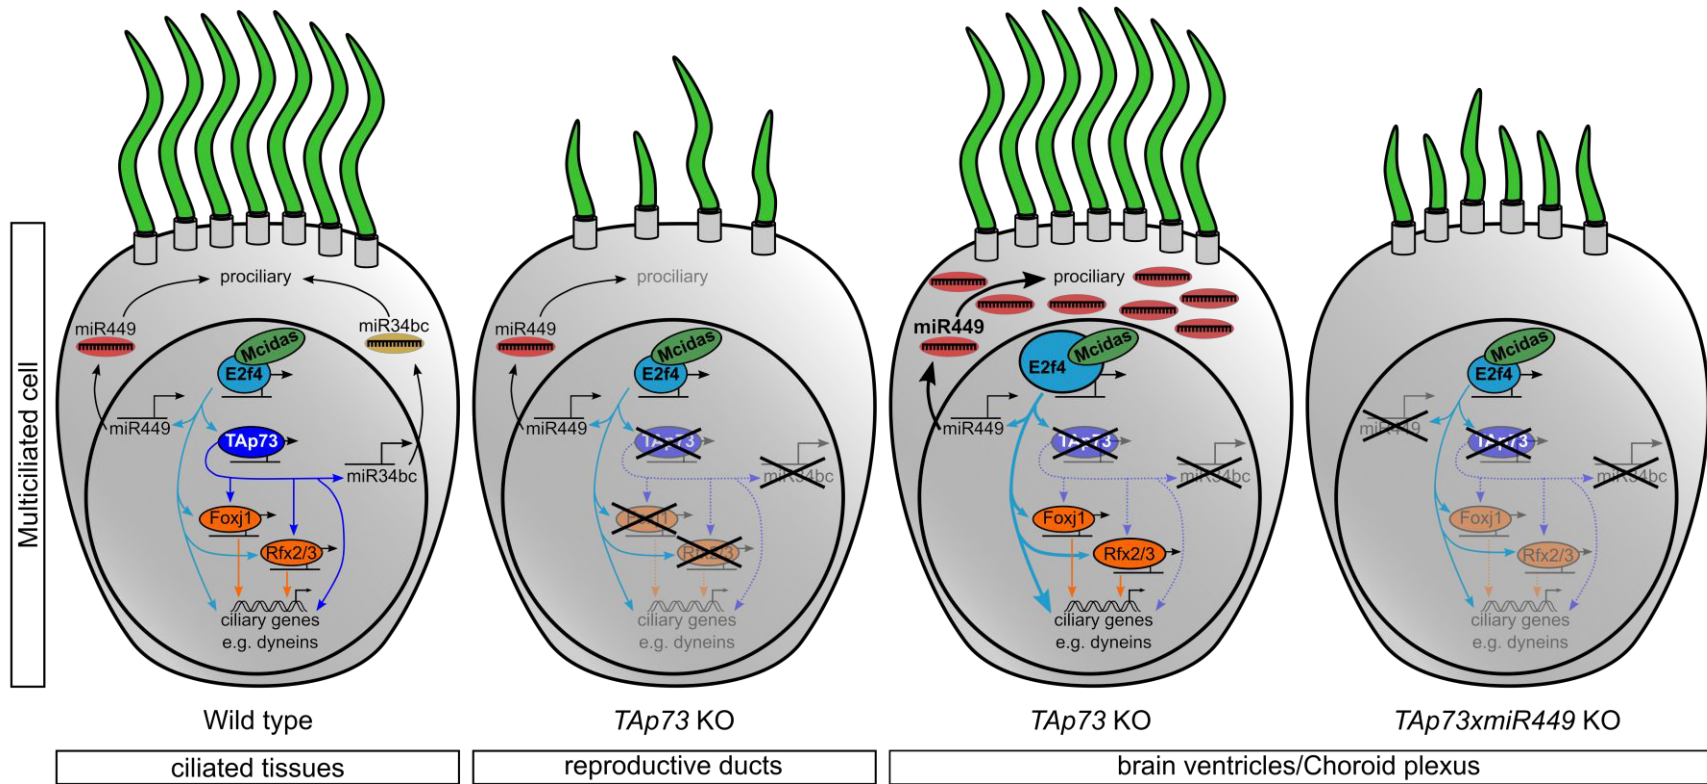

432

433

434

435

436

437

438

439

440

441

**Legend to Figure 6.** Schematic diagram of the molecular mechanisms of TAp73-driven multiciliogenesis in diverse tissues.

- TAp73-dependent transcriptional network, including dyneins, *miR34bc*, *Foxj1* and *Rfx2/3* factors, critically regulates multiciliogenesis in various ciliated tissues downstream of *E2f4/Mcidas*.
- In reproductive ducts TAp73 ensures the generation of MCCs and proper gamete and zygote transport, whereas loss of *TAp73* impairs fertility in male and female.
- *TAp73* is not essential for multiciliogenesis in the brain; however, *TAp73* loss leads to upregulation of pro-ciliogenic *E2f4* and its target *miR449*.
- Further removal of *miR449* in addition to *TAp73* loss leads to reduced cilia and severe hydrocephalus, indicating that *miR449* partially compensates loss of *TAp73* in brain ciliogenesis.

442

## 443 Discussion

444

445 TAp73 activates a plethora of ciliogenic effectors to drive multiciliogenesis in the airways (Marshall  
446 et al., 2016; Nemajerova et al., 2016). The current study examines the role of TAp73-driven  
447 molecular circuit in MCCs of reproductive tracts and the brain. Our results revealed profound  
448 changes in both male and female reproductive tracts lacking *TAp73*, suggesting that infertility  
449 associated with TAp73 loss can be in part explained by cilia loss. The striking reduction in MCCs  
450 in *TAp73*<sup>-/-</sup> oviduct and EDs, together with diminished *Foxj1*, *Rfx2* and *Rfx3* expression, is  
451 reminiscent of findings in respiratory epithelia of *TAp73* KO mice. The expression of dyneins  
452 *Dnai1* and *Dnali1*, both of which exhibit TAp73 binding in their genomic loci, is significantly  
453 reduced in mutant animals, indicating that they are part of TAp73-directed multiciliogenesis  
454 program in reproductive tracts.

455

456 The integrity of MCCs is critical for reproductive health. Disruption of transcriptional regulators of  
457 multiciliogenesis consistently leads to infertility in mice and in humans (Amirav et al., 2016; Terré  
458 et al., 2016), whereas fertility issues have been reported in female primary ciliary dyskinesia  
459 patients (Raidt et al., 2015; Vanaken et al., 2017). Importantly, *TAp73* is downregulated as women  
460 age (Guglielmino et al., 2011), whereas certain single nucleotide polymorphisms in *TP73* is  
461 associated with female patients over 35 years of age seeking *in vitro* fertilization treatment (Feng  
462 et al., 2011; Hu, Zheng, & Wang, 2011). Further studies using tissue-specific deletion of *TAp73*  
463 are necessary to delineate its role in reproductive motile cilia maintenance and fertility.

464

465 In *TAp73*<sup>-/-</sup> males, consistent with previous reports, we found partial degradation of the germinal  
466 epithelium and reduced sperm cell production (Holembowski et al., 2014; Inoue et al., 2014).  
467 However, although reduced in number, spermatocytes in *TAp73* KO are morphologically normal  
468 with beating flagella, raising questions about the underlying causes of sterility in these mice. The  
469 efferent ducts connecting testis and epididymis comprise multiciliated cells that are required for  
470 the transport of spermatozoa to their storage and maturation location. Our present work reveals  
471 that male sterility in mice with defective multiciliogenesis e.g. *TAp73*<sup>-/-</sup> mice can at least partially  
472 be attributed to defective ED epithelia.

473

474 During embryogenesis, robust *TAp73* expression is initiated at the onset of multiciliate  
475 differentiation of ependymal and CP epithelial cells. However, our data indicate that generation of  
476 multiciliated cells in the brain appears independent of *TAp73*, although we cannot exclude that  
477 *TAp73* KO generates more subtle defects in polarity or cilia orientation. In contrast to the dynamic  
478 TAp73-dependent program in the airways and reproductive tracts, the expression of *Foxj1*, *Rfx2*  
479 and *Rfx3* in the *TAp73*<sup>-/-</sup> brain remains unaltered and exhibits a slight increase respectively,  
480 suggesting that other effectors maintain the molecular circuit to support MCCs.

481

482 Previous studies revealed robust expression of *GemC1* and *E2f/Mcidas*, all of which are capable  
483 of transcriptional activation of *Foxj1*, *TAp73* itself, and many other ciliogenic effectors e.g. *Rfx2*  
484 and *Rfx3*, in MCCs in the brain (Arbi et al., 2016; Boon et al., 2014; Kyrousi et al., 2016; Pefani  
485 et al., 2011; Stubbs et al., 2012). Indeed, E2F4/MCIDAS activity is induced in response to *TAp73*

486 loss, and therefore may facilitate brain multiciliogenesis in the absence of *TAp73*. In agreement,  
487 loss of either *E2F4* or *GemC1* leads to defect in MCC differentiation and hydrocephalus  
488 (Lindeman et al., 1998; Terré et al., 2016).

489  
490 Though it is less clear how *TAp73* loss results in enhanced MCIDAS/E2F activity, a quick look  
491 downstream of *TAp73* provides some clues: a decrease of *TAp73* target *mir34bc* accompanied  
492 by an increase in *miR449* in the absence of *TAp73*. *miR449* induction is commonly observed after  
493 *mir34*-deficient MCCs, whereby ablation of the entire *miR-34/449* family impairs multiciliogenesis  
494 (Bao et al., 2012; Song et al., 2014). *miR449* is also known to inhibit the NOTCH pathway to  
495 relieve the suppression of multiciliogenesis; however, NOTCH pathway activity in the CP remains  
496 unchanged after *miR449* loss. Given the diverse targets of the *miR-34/449* family, it is plausible  
497 that *miR449* may enhance MCIDAS/E2F activity independent of NOTCH inhibition. Conversely,  
498 transcriptional activation of *miR449* by MCIDAS/E2F complexes may complete the feedback loop  
499 to keep the molecular circuit fully engaged in the absence of *TAp73*.

500  
501 This interpretation posits that the crosstalk between *miR449* and MCIDAS/E2F serves as a crucial  
502 backup for *TAp73*-driven circuitry in the brain. Indeed, depletion of *miR449* in the absence of  
503 *TAp73* results in defective ciliogenesis, indicating that *TAp73* functions through *miR-34/449* family  
504 to generate MCCs in the brain. Of note, complete loss of *miR-34/449* family does not recapitulate  
505 hydrocephalus phenotype observed in mice lacking both *TAp73* and *miR449* (Fededa et al., 2016;  
506 Song et al., 2014). In addition, hydrocephalus and secondary cilia depletion were described for  
507 *p73* KO mice lacking all isoforms, but not observed in *TAp73* mutant animals, suggesting a  
508 potential role for  $\Delta Np73$  isoforms (Medina-Bolívar et al., 2014; A. Yang et al., 2000). Taken  
509 together, the molecular interactome of *p73* family in brain ciliogenesis is fascinatingly complex  
510 and just beginning to unravel.

511  
512  
513

## 514 **Supplementary Material**

515  
516 **Figure 5 – Table supplement 1.** Summary of sequencing of small RNA species from lateral  
517 ventricle/CP of WT ( $n=3$ ) and *TAp73*<sup>-/-</sup> ( $n=4$ ) mice. GEO accession number: **GSE108385**.

518  
519 **Figure 2–video supplement 1.** Spermatocyte movement in *TAp73*<sup>+/-</sup> (**A, B**) and *TAp73*<sup>-/-</sup> mice  
520 (**C, D**).

521  
522 **Figure 3–video supplement 1.** Smooth muscle contraction in fallopian tube of WT (**A**) and  
523 *TAp73*<sup>-/-</sup> (**B**) mice.

524  
525 **Figure 4–video supplement 1.** Ciliary beating in WT (**A**, 3<sup>rd</sup> ventricle) and *TAp73*<sup>-/-</sup> (**B**, lateral  
526 ventricle) mice.

527  
528  
529



## 530 **Materials and Methods**

531

### 532 **Animals**

533 *TAp73* mutant mice with targeted deletion of exons 2 and 3 of the *Trp73* gene were a generous  
534 gift from Dr. Tak Mak (Princess Margaret Cancer Centre, Toronto, Canada) (Tomasini et al.,  
535 2008). *miR449* mutants were previously described (Song et al., 2014). Both strains were  
536 maintained in C57Bl/6 background (n8) at the animal facility of the European Neuroscience  
537 Institute Göttingen, Germany in full compliance with institutional guidelines. The study was  
538 approved by the Animal Care Committee of the University Medical Centre Goettingen and the  
539 authorities of Lower-Saxony under the number 16/2069.

540

### 541 **Human samples**

542 Human epididymis samples were procured with informed consent from two patients (42 and 41  
543 years of age, respectively). All experimental procedures were approved and performed in  
544 accordance with the requirements set forth by Ethics Committee of the University Medical Centre  
545 Goettingen (application number: 18/2/16).

546

### 547 **Histology and immunostaining**

548 Paraformaldehyde-fixed, paraffin-embedded tissues were treated with heat-induced epitope  
549 retrieval using Rodent Decloaker (RD913 L, Biocare Medical). For immunohistochemistry,  
550 endogenous peroxidase activity was quenched with 3% H<sub>2</sub>O<sub>2</sub> for 10 minutes. Tissue sections  
551 were blocked with 10% fetal calf serum (FCS) in phosphate buffered saline (PBS) with 0.1% Triton  
552 X-100, and subsequently incubated with primary antibody (List of antibodies in **Table 1**).  
553 Biotinylated secondary antibodies were applied for 1 hour at room temperature (List of antibodies  
554 in **Table 2**), after which avidin enzyme complex and substrate/chromogen were used for color  
555 development (Vector laboratories). Stained tissue sections were counterstained with hematoxylin.  
556 For immunofluorescence, sections were stained with fluorescently labeled secondary antibodies  
557 (**Table 2**) for 1 h at room temperature. Nuclei were counterstained with DAPI.

558

559 **Table 1.** Primary antibody information.

| <b>Antibodies</b>                       | <b>Dilution (Application)</b> | <b>Company</b> | <b>Catalog # [clone]</b> |
|-----------------------------------------|-------------------------------|----------------|--------------------------|
| Mouse monoclonal anti-Ac- $\alpha$ -TUB | 1:1000 (IF)                   | Sigma          | T6793 [6-11B-1]          |
| Mouse monoclonal anti- ARL13B           | 1:500 (IF)                    | NeuroMab       | 75-287 [N295B/66]        |
| Rabbit polyclonal anti-ARL13B           | 1:500 (IHC)                   | Proteintech    | 17711-1-AP               |
| Mouse monoclonal anti- AQP1             | 1:1000 (IHC, IF)              | Abcam          | ab9566 [1/22]            |
| Rabbit polyclonal anti-AQP1             | 1:1000 (IF)                   | EMD Millipore  | AB2219                   |
| Rabbit polyclonal anti- $\beta$ -ACTIN  | 1:10000 (WB)                  | Abcam          | ab8227                   |

|                                     |                             |               |                  |
|-------------------------------------|-----------------------------|---------------|------------------|
| Rabbit polyclonal anti-Cytokeratins | 1:100 (IHC)                 | Dako          | Z0622            |
| Rabbit polyclonal anti-DNAI1        | 1:500 (IF); 1:700 (WB)      | Sigma         | HPA021649        |
| Goat polyclonal anti-DNAL1          | 1:300 (WB)                  | Santa Cruz    | sc-160296        |
| Rabbit polyclonal anti-FOXJ1        | 1:500 (WB)                  | Sigma         | HPA005714        |
| Mouse monoclonal anti-HSC70         | 1:20000 (WB)                | Santa Cruz    | sc-7298 [B-6]    |
| Rabbit monoclonal anti-KI-67        | 1:100 (IF)                  | Abcam         | ab16667 [SP6]    |
| Rabbit polyclonal anti-OTX2         | 1:500 (IHC)                 | EMD Millipore | AB9566           |
| Rabbit monoclonal anti-P73          | 1:100 (IF, IHC); 1:300 (WB) | Abcam         | ab40658 [EP436Y] |
| Rabbit polyclonal anti-TTR          | 1:100 (IHC)                 | Proteintech   | 1189-1-AP        |

560

561 **Table 2.** Secondary antibody information.

| <b>Antibodies</b>                                    | <b>Dilution (Application)</b> | <b>Company</b>           | <b>Catalog #</b> |
|------------------------------------------------------|-------------------------------|--------------------------|------------------|
| Alexa Fluor 488 donkey anti-mouse                    | 1:500 (IF)                    | Thermo Fisher Scientific | A21202           |
| Alexa Fluor 594 goat anti-rabbit                     | 1:500 (IF)                    | Thermo Fisher Scientific | A11012           |
| Peroxidase-conjugated donkey anti-mouse              | 1:10000 (WB)                  | Jackson ImmunoResearch   | 715-036-150      |
| Peroxidase-conjugated donkey anti-goat               | 1:10000 (WB)                  | Jackson ImmunoResearch   | 705-036-147      |
| Peroxidase-conjugated donkey anti-rabbit             | 1:10000 (WB)                  | Jackson ImmunoResearch   | 711-036-152      |
| Biotin-SP-conjugated AffiniPure Goat Anti-Rabbit IgG | 1:1000 (IHC)                  | Jackson ImmunoResearch   | 111-065-144      |
| Biotin-SP-conjugated AffiniPure Donkey Anti-Mouse    | 1:1000 (IHC)                  | Jackson ImmunoResearch   | 715-065-151      |

562

563

564

565

566

567

568 **Quantification of cilia markers**

569 Cilia were quantified using *ImageJ* software (Schindelin et al., 2012). Briefly, the region of interest  
570 was selected and a threshold was set to exclude unspecific background signals. The *Analyze*  
571 *Particles* tool was used to measure the area of the ciliary staining. Values were normalized to the  
572 length of the epithelia measured.

573

574 **Western blot**

575 Samples were homogenized in RIPA buffer (20 mM TrisHCl pH7.5, 150 mM NaCl, 9.5 mM EDTA,  
576 1% Triton X100, 0.1% SDS, 1% sodium desoxycholate) supplemented with urea (2.7 M) and  
577 protease inhibitors (Complete Mini EDTA-free, Roche). Equal amounts of protein extracts were  
578 separated by SDS-polyacrylamide gels prior to transfer onto a nitrocellulose membrane and  
579 incubated with primary antibodies (**Table 1**). The membrane was washed and incubated for 1  
580 hour with horse radish peroxidase (HRP)-conjugated secondary antibodies (**Table 2**) followed by  
581 chemiluminescence detection.  $\beta$ -actin or heat shock cognate 71 kDa protein (HSC70) was used  
582 as protein loading control.

583

584 **RNA extraction, quantitative PCR, *in situ* hybridization, and small RNA sequencing**

585 Tissue samples were snap-frozen in liquid nitrogen and total RNA was isolated by Extrazol  
586 (7BioScience)/Chloroform extraction followed by 80% ethanol precipitation at -20°C. For cDNA  
587 synthesis, 1  $\mu$ g of total RNA was incubated with the M-MuLV reverse transcriptase and a mix of  
588 random nonameric and polyA tail primers at 42°C for 1h in a total volume of 50  $\mu$ l. All reactions  
589 were set up in triplicate with self-made SYBR Green qPCR Mix (Tris-HCl [75mM], (NH<sub>4</sub>)<sub>2</sub>SO<sub>4</sub>  
590 [20mM], Tween-20 [0.01% v/v], MgCl<sub>2</sub> [3mM], Triton X-100 [0.25% v/v], SYBR Green I (1:40,000),  
591 dNTPs [0.2mM] and Taq-polymerase [20U/ml]) using 250nM of each gene-specific primers (**Table**  
592 **3**). Standard curve method was used to assess relative transcript content; transcript of interest  
593 was normalized to reference transcript of ribosomal phosphoprotein P0 (*Rplp0*, or *36B4*) and  
594 normalized to the mean value of control samples. The results for each sample were obtained by  
595 averaging transcript levels of technical triplicates. No RT controls and dilution curves as well as  
596 melting curves and gel electrophoresis assessment of amplicons were performed for all primer  
597 combinations. For *miR-449a* quantification, TaqMan MicroRNA Assay (Thermo Fisher Scientific)  
598 was performed according to the manufacturer's instructions with U6 snRNA as internal control.

599

600 *Hes1* (probe no. 417701) and *Hes5* (probe no. 400991-C2) were visualized using RNAscope 2.5  
601 HD Duplex Reagent Kit (#322430, Advanced Cell Diagnostics, Hayward, CA) according to  
602 manufacturer's instructions.

603

604 The libraries for Small RNA samples were prepared using TruSeq Small RNA Library Prep Kit -  
605 Set A (24 rxns) (Set A: indexes 1-12); Cat N°: RS-200-001 using 1  $\mu$ g of total RNA according to  
606 manufactures recommendations. Samples were sequenced on the Illumina HiSeq 4000 using a  
607 50 bp single-end approach. Mapping, prediction of novel miRNAs, quality control, and differential  
608 expression (DE) analysis were carried out using Oasis2.0 (*Oasis: online analysis of small RNA*  
609 *deep sequencing data*) (Capece et al., 2015). In brief, FASTQ files were trimmed with cutadapt  
610 1.7.1 (Martin, 2011) removing Truseq adapter sequences (TGGAATTCTCGGGTGCCAAGG)  
611 followed by removing sequences smaller than 15 or larger than 32 nucleotides. Trimmed FASTQ

612 sequences were aligned to mouse sRNAs using STAR version 2.4.1d (Dobin et al., 2013) with a  
 613 mismatch of 5% of the sequence length and by utilizing the following databases: Mirbase version  
 614 21 for microRNA (miRNAs); piRNAbank V.2 for piwiRNA (piRNA); and Ensembl v84 for small  
 615 nuclear RNA (snRNA), small nucleolar RNA (snoRNA) and ribosomal RNA (rRNA). Counts per  
 616 small RNA were calculated using featureCounts v1.4.6 (Liao, Smyth, & Shi, 2014). Novel miRNAs  
 617 were searched for using miRDeep2 version 2.0.0.5 (Friedländer, Mackowiak, Li, Chen, &  
 618 Rajewsky, 2012). Differential expression of small RNA was determined by DESeq2 (Love, Huber,  
 619 & Anders, 2014), where sRNAs were considered differentially expressed with an adjusted p-value  
 620 <0.05 and absolute log<sub>2</sub> fold-change >1. The results of the DE analysis can be found in **Figure 5**  
 621 – **Table supplement 1**, and the sRNA-seq data sets can be found in Gene Expression Omnibus  
 622 (GEO) with accession number **GSE108385**.

623

624 **Table 3.** Sequence information for primers used in RT-qPCR.

| Gene                 | Accession number | Amplicon bp | Exons   | Forward primer                  | Reverse primer                    |
|----------------------|------------------|-------------|---------|---------------------------------|-----------------------------------|
| <b><i>TAp73</i></b>  | NM_011642        | 163         | Ex2-Ex3 | 5'-AGCAGAATGAGCGGC<br>AGCGTT-3' | 5'-TGTTGGACTCCTCGC<br>TGCTGA-3'   |
| <b><i>Foxj1</i></b>  | NM_008240        | 200         | Ex2-Ex3 | 5'-CCATGCAGACCCCA<br>CCTGGCA-3' | 5'-GGGCAAAGGCAGGGT<br>GGATGT-3'   |
| <b><i>Dnali1</i></b> | NM_175223        | 213         | Ex4-Ex5 | 5'-TTTGGCATGAGGAA<br>GGCACT-3'  | 5'-CTGGTTGGTCCGTTT<br>CAGGA-3'    |
| <b><i>Mcidas</i></b> | NM_001037<br>914 | 137         | Ex7     | 5'-AACAACGAAAAGGA<br>GCCTGGA-3' | 5'-GCCGCTTAGGGTCAC<br>GATTG-3'    |
| <b><i>E2f4</i></b>   | NM_148952        | 199         | Ex7-Ex9 | 5'-GCACTGGACACTCG<br>GCCT-3'    | 5'-TGCACTCTCTCGTGG<br>GGTCG-3'    |
| <b><i>Rfx2</i></b>   | NM_027787        | 74          | Ex5-Ex6 | 5'-GACGGCACAAGACA<br>CTCTCTG-3' | 5'-AGAGTCTCAATCGCC<br>ATTTCAAG-3' |
| <b><i>Rfx3</i></b>   | NM_001360<br>357 | 107         | Ex3     | 5'-ATGCAGACTTCAGA<br>GACGGGT-3' | 5'-ACTGGCACTTGCTGT<br>ACCAC-3'    |
| <b><i>36b4</i></b>   | NM_007475        | 155         | Ex6-Ex7 | 5'-GCAGATCGGGTACC<br>CAAC-3'    | 5'-CAGCAGCCGCAAATG<br>CAG-3'      |

625

626

### 627 Chromatin immuno-precipitation (ChIP)

628 Chromatin was harvested from Saos2 cells transiently overexpressing TAp73 $\alpha$ , TAp73 $\beta$  and the  
 629 control vector pcDNA3.1. ChIP and qPCR was performed as previously described using gene  
 630 specific primers (**Table 4**) (Nemajerova et al., 2016). Enrichment levels were determined as the  
 631 number of PCR products for each gene relative to total input.

632

633 **Table 4.** Sequence information for primers used in ChIP-qPCR.

| Gene              | Forward primer            | Reverse primer              |
|-------------------|---------------------------|-----------------------------|
| <b>FOXJ1 down</b> | 5'-CAGCATGCCAAGCTTTG-3'   | 5'-TCAGGGGCTGCATTCTTCC-3'   |
| <b>FOXJ1 end</b>  | 5'-AGGGCACACTTAGCCTTTG-3' | 5'-AGGAGACAAAGGGAGGAGG-3'   |
| <b>DNAI1</b>      | 5'-CCCAAGCGGGTAATCTCT-3'  | 5'-CTTGAGGTTGTGGGACTTCAC-3' |
| <b>DNALI1</b>     | 5'-CACGCCCGCAAATTTCTG-3'  | 5'-CAAGGTGGGCAGATCATGTG-3'  |

634

635 **Luciferase assay**

636 Luciferase assay was performed as previously described (Nemajerova et al., 2016). Briefly,  
 637 Saos2 cells were transfected with pcDNA3.1 empty vector, or pcDNA3.1 vector carrying *E2F4*, or  
 638 pcDNA3.1 vector, or both *E2F4* and *MCIDAS* vectors, together with a firefly luciferase reporter  
 639 construct containing the putative three wild type E2F-binding sequence of *miR449* genomic region  
 640 (wild type, or “WT”), or the same sequence lacking the strongest predicted E2F-binding motif  
 641 (mutant, or “Mut”) (**Table 5**). In addition, a Renilla TK luciferase vector was co-transfected. At 24  
 642 hours after transfection, cells were harvested and the luciferase activities were measured using  
 643 the dual luciferase assay. Firefly luciferase activities were determined relative to those of Renilla  
 644 TK luciferase vector and normalized to the mean value of samples from control vector.

645

646 **Table 5:** Luciferase constructs for E2F4/MCIDAS reporter assay.

647 RS: Restriction site

| Construct name                                                  | DNA sequence of inserts                                                                                                                                                                                              | Vector  | 5' RS | 3' RS |
|-----------------------------------------------------------------|----------------------------------------------------------------------------------------------------------------------------------------------------------------------------------------------------------------------|---------|-------|-------|
|                                                                 | The strongest E2F binding site is depicted in grey and the removed sequence in <b>bold underlined</b> . Two consensus sequences with lower score were retained in the mutant (pink and red).                         |         |       |       |
| <b>miR449/Cdc20b</b><br>WT E2F<br>binding site = <b>WT</b>      | GCCAGAAAGCTGAGCACACTGGGGACTC<br>CGTGATAAAGGGG <b>GAGAGGAAGAT</b> ATTG<br>AGGGTTGAGGAAGAGGTCTG <b>GCGGGAAA</b><br><b>TGACAGGGGAACC</b> AGATGGGCTGTGCAGC<br>CTTAGCTGCCCATCTGAGCTGCCAAGAGA<br>GCCGAGTTGTGCCATATGGCAGGAG | pGL4.23 | NheI  | EcoRV |
| <b>miR449/Cdc20b</b><br>Mut E2F<br>binding site =<br><b>Mut</b> | GCCAGAAAGCTGAGCACACTGGGGACTC<br>CGTGATAAAGGGG <b>GAGAGGAAGAT</b> ATTG<br>AGGGTTGAGGAAGAGGTCTG <b>GACAGGGA</b><br><b>ACC</b> AGATGGGCTGTGCAGCCTTAGCTGC<br>CCATCTGAGCTGCCAAGAGAGCCGAGTT<br>GTGCCATATGGCAGGAG           | pGL4.23 | NheI  | EcoRV |

648

649

650

## 651 **Video microscopy**

652 Murine fallopian tubes or testis were dissected and transferred to DMEM. Peristaltic contraction  
653 of fallopian tube was imaged with an inverse microscope. To image spermatocytes, epididymis  
654 was separated from testis and vas deferens. An incision was made at distal end to release to  
655 spermatocytes.

656

## 657 **Imaging of cilia-generated bead-flow and cilia beating in the brain ventricular system**

658 Mouse brains were dissected and transferred to DMEM 21063 (Thermo Fisher Scientific). Lateral  
659 ventricle (LV) and ventral third ventricle (v3V) were prepared from a 1mm coronal slice, a 3mm  
660 slice, and two 1 mm slices in a coronal adult brain matrix (ASI Instruments) as previously  
661 described (Faubel, Westendorf, Bodenschatz, & Eichele, 2016). Tissue explant was placed in  
662 DMEM 21063 containing fluorescent latex beads (Fluoresbrite Multifluorescent 1.0 micron  
663 Microspheres, Polysciences). Movement of fluorescent beads along the ventricular wall and within  
664 ventricular lumen was observed by differential interference contrast (DIC) microscopy using a  
665 DMR (Leica) upright microscope with epifluorescence lamp. Bead movement was recorded using  
666 a high-speed camera operated by MultiRecorder Software (Cascade II-512, Photometrics) and  
667 analyzed using ImageJ software (Schindelin et al., 2012).

668

## 669 **Statistical Analysis**

670 One-tailed, unpaired Student's test assuming normal distribution was used to calculate statistical  
671 significance for pairwise comparisons. Luciferase assay statistics were assessed using one-way  
672 ANOVA assuming normal distribution followed by Bonferroni's multiple comparison tests. The  
673 following indications of significance were used: \* $P < 0.05$ , \*\*  $P < 0.01$ , \*\*\*  $P < 0.005$ . N values  
674 represent biological replicates. Error bars indicate standard error of the mean (SEM).

675

676

677

## 678 **Acknowledgments**

679 We thank Tak Mak for providing *TAp73* KO mice, Gerd Hasenfuss for support, Matthias  
680 Döbelstein for hosting and Karola Metze, Verena Siol and Sabine Bolte for assistance. M.L. is  
681 supported by Deutsche Forschungsgemeinschaft (DFG Li 2405); H.Z. by New York Institute of  
682 Technology, Sanford Research, Matthew Larson Foundation, Institutional Development Award  
683 from the National Institute of General Medical Sciences under grant numbers 5P20GM103548,  
684 1P20GM103620-01A1, and National Cancer Institute (R01CA220551); F.B. by Wilhelm-Sander-  
685 Stiftung (2016.041.1); A.K.G by the Max Planck Society. We thank Heymut Omran's group for  
686 introduction to cilia microscopy and Travis Stracker for disclosure of non-published data.

687

## 688 **Author Contributions**

689 T.E. and Me.W. characterized cilia defects and gene expression and generated figures. Me.W.  
690 and Ma.W. validated *TAp73* targets by WB and ChIP. E.E. and F.B. contributed IF analysis of  
691 human epididymis. C.W. maintained mice, performed RNA isolation and qPCRs. K.B.G., J.Z., L.L.  
692 and H.Z. contributed brain analyzes. O.S. analyzed small RNA sequencing data. S.A. contributed  
693 to interpretation and supported the group. M.L. developed the project, interpreted the data,

694 designed and coordinated the experiments to complete this study. Me.W., T.E., H.Z. and M.L.  
695 were major contributors to manuscript preparation.

696

697 **Competing Financial Interest Statement**

698 The authors declare no competing financial interests.

699

700

## 701 **References**

- 702 Amirav, I., Wallmeier, J., Loges, N. T., Menchen, T., Pennekamp, P., Mussaffi, H., ... Israeli PCD  
703 Consortium Investigators. (2016). Systematic Analysis of CCNO Variants in a Defined Population:  
704 Implications for Clinical Phenotype and Differential Diagnosis. *Human Mutation*, 37(4), 396–405.  
705 <https://doi.org/10.1002/humu.22957>
- 706 Arbi, M., Pefani, D.-E., Kyrousi, C., Lalioti, M.-E., Kalogeropoulou, A., Papanastasiou, A. D., ... Lygerou, Z.  
707 (2016). GemC1 controls multiciliogenesis in the airway epithelium. *EMBO Reports*, 17(3), 400–413.  
708 <https://doi.org/10.15252/embr.201540882>
- 709 Bao, J., Li, D., Wang, L., Wu, J., Hu, Y., Wang, Z., ... Xu, C. (2012). MicroRNA-449 and MicroRNA-34b/c  
710 Function Redundantly in Murine Testes by Targeting E2F Transcription Factor-Retinoblastoma Protein  
711 (E2F-pRb) Pathway. *Journal of Biological Chemistry*, 287(26), 21686–21698.  
712 <https://doi.org/10.1074/jbc.M111.328054>
- 713 Bill, B. R., Balciunas, D., McCarra, J. A., Young, E. D., Xiong, T., Spahn, A. M., ... Schimmenti, L. A. (2008).  
714 Development and Notch Signaling Requirements of the Zebrafish Choroid Plexus. *PLoS ONE*, 3(9), e3114.  
715 <https://doi.org/10.1371/journal.pone.0003114>
- 716 Blatt, E. N., Yan, X. H., Wuerffel, M. K., Hamilos, D. L., & Brody, S. L. (1999). Forkhead transcription factor  
717 HFH-4 expression is temporally related to ciliogenesis. *American Journal of Respiratory Cell and*  
718 *Molecular Biology*, 21(2), 168–176. <https://doi.org/10.1165/ajrcmb.21.2.3691>
- 719 Boon, M., Wallmeier, J., Ma, L., Loges, N. T., Jaspers, M., Olbrich, H., ... Omran, H. (2014). MCIDAS  
720 mutations result in a mucociliary clearance disorder with reduced generation of multiple motile cilia.  
721 *Nature Communications*, 5, 4418. <https://doi.org/10.1038/ncomms5418>
- 722 Brody, S. L., Yan, X. H., Wuerffel, M. K., Song, S. K., & Shapiro, S. D. (2000). Ciliogenesis and left-right axis  
723 defects in forkhead factor HFH-4-null mice. *American Journal of Respiratory Cell and Molecular Biology*,  
724 23(1), 45–51. <https://doi.org/10.1165/ajrcmb.23.1.4070>
- 725 Capece, V., Garcia Vizcaino, J. C., Vidal, R., Rahman, R.-U., Pena Centeno, T., Shomroni, O., ... Bonn, S.  
726 (2015). Oasis: online analysis of small RNA deep sequencing data. *Bioinformatics*, 31(13), 2205–2207.  
727 <https://doi.org/10.1093/bioinformatics/btv113>
- 728 Caspary, T., Larkins, C. E., & Anderson, K. V. (2007). The Graded Response to Sonic Hedgehog Depends  
729 on Cilia Architecture. *Developmental Cell*, 12(5), 767–778. <https://doi.org/10.1016/j.devcel.2007.03.004>
- 730 Chen, J., Knowles, H. J., Hebert, J. L., & Hackett, B. P. (1998). Mutation of the mouse hepatocyte nuclear  
731 factor/forkhead homologue 4 gene results in an absence of cilia and random left-right asymmetry. *The*  
732 *Journal of Clinical Investigation*, 102(6), 1077–1082. <https://doi.org/10.1172/JCI4786>
- 733 Choksi, S. P., Lauter, G., Swoboda, P., & Roy, S. (2014). Switching on cilia: transcriptional networks  
734 regulating ciliogenesis. *Development (Cambridge, England)*, 141(7), 1427–1441.  
735 <https://doi.org/10.1242/dev.074666>
- 736 Crow, J., Amso, N. N., Lewin, J., & Shaw, R. W. (1994). Morphology and ultrastructure of fallopian tube  
737 epithelium at different stages of the menstrual cycle and menopause. *Human Reproduction (Oxford,*  
738 *England)*, 9(12), 2224–2233.



- 739 Dacheux, J.-L., & Dacheux, F. (2013). New insights into epididymal function in relation to sperm  
740 maturation. *Reproduction*, *147*(2), R27–R42. <https://doi.org/10.1530/REP-13-0420>
- 741 Danielian, P. S., Bender Kim, C. F., Caron, A. M., Vasile, E., Bronson, R. T., & Lees, J. A. (2007). E2f4 is  
742 required for normal development of the airway epithelium. *Developmental Biology*, *305*(2), 564–576.  
743 <https://doi.org/10.1016/j.ydbio.2007.02.037>
- 744 Danielian, P. S., Hess, R. A., & Lees, J. A. (2016). E2f4 and E2f5 are essential for the development of the  
745 male reproductive system. *Cell Cycle (Georgetown, Tex.)*, *15*(2), 250–260.  
746 <https://doi.org/10.1080/15384101.2015.1121350>
- 747 Del Bigio, M. R. (2010). Ependymal cells: biology and pathology. *Acta Neuropathologica*, *119*(1), 55–73.  
748 <https://doi.org/10.1007/s00401-009-0624-y>
- 749 Diez-Roux, G., Banfi, S., Sultan, M., Geffers, L., Anand, S., Rozado, D., ... Ballabio, A. (2011). A High-  
750 Resolution Anatomical Atlas of the Transcriptome in the Mouse Embryo. *PLoS Biology*, *9*(1), e1000582.  
751 <https://doi.org/10.1371/journal.pbio.1000582>
- 752 Dobin, A., Davis, C. A., Schlesinger, F., Drenkow, J., Zaleski, C., Jha, S., ... Gingeras, T. R. (2013). STAR:  
753 ultrafast universal RNA-seq aligner. *Bioinformatics (Oxford, England)*, *29*(1), 15–21.  
754 <https://doi.org/10.1093/bioinformatics/bts635>
- 755 Faubel, R., Westendorf, C., Bodenschatz, E., & Eichele, G. (2016). Cilia-based flow network in the brain  
756 ventricles. *Science*, *353*(6295), 176–178. <https://doi.org/10.1126/science.aae0450>
- 757 Fededa, J. P., Esk, C., Mierzwa, B., Stanyte, R., Yuan, S., Zheng, H., ... Gerlich, D. W. (2016). MicroRNA-  
758 34/449 controls mitotic spindle orientation during mammalian cortex development. *The EMBO Journal*,  
759 *35*(22), 2386–2398. <https://doi.org/10.15252/emj.201694056>
- 760 Feng, Z., Zhang, C., Kang, H.-J., Sun, Y., Wang, H., Naqvi, A., ... Hu, W. (2011). Regulation of female  
761 reproduction by p53 and its family members. *FASEB Journal: Official Publication of the Federation of*  
762 *American Societies for Experimental Biology*, *25*(7), 2245–2255. <https://doi.org/10.1096/fj.10-180166>
- 763 Friedländer, M. R., Mackowiak, S. D., Li, N., Chen, W., & Rajewsky, N. (2012). miRDeep2 accurately  
764 identifies known and hundreds of novel microRNA genes in seven animal clades. *Nucleic Acids Research*,  
765 *40*(1), 37–52. <https://doi.org/10.1093/nar/gkr688>
- 766 Guglielmino, M. R., Santonocito, M., Vento, M., Ragusa, M., Barbagallo, D., Borzì, P., ... Di Pietro, C.  
767 (2011). TAp73 is downregulated in oocytes from women of advanced reproductive age. *Cell Cycle*  
768 *(Georgetown, Tex.)*, *10*(19), 3253–3256. <https://doi.org/10.4161/cc.10.19.17585>
- 769 Hess, R. A. (2002). The Efferent Ductules: Structure and Functions. In B. Robaire & B. T. Hinton (Eds.),  
770 *The Epididymis: From Molecules to Clinical Practice* (pp. 49–80). Boston, MA: Springer US. Retrieved  
771 from [http://link.springer.com/10.1007/978-1-4615-0679-9\\_4](http://link.springer.com/10.1007/978-1-4615-0679-9_4)
- 772 Holembowski, L., Kramer, D., Riedel, D., Sordella, R., Nemajerova, A., Dobbstein, M., & Moll, U. M.  
773 (2014). TAp73 is essential for germ cell adhesion and maturation in testis. *The Journal of Cell Biology*,  
774 *204*(7), 1173–1190. <https://doi.org/10.1083/jcb.201306066>
- 775 Hu, W., Zheng, T., & Wang, J. (2011). Regulation of Fertility by the p53 Family Members. *Genes &*  
776 *Cancer*, *2*(4), 420–430. <https://doi.org/10.1177/1947601911408892>

- 777 Ilio, K. Y., & Hess, R. A. (1994). Structure and function of the ductuli efferentes: a review. *Microscopy*  
778 *Research and Technique*, 29(6), 432–467. <https://doi.org/10.1002/jemt.1070290604>
- 779 Inoue, S., Tomasini, R., Rufini, A., Elia, A. J., Agostini, M., Amelio, I., ... Mak, T. W. (2014). TAp73 is  
780 required for spermatogenesis and the maintenance of male fertility. *Proceedings of the National*  
781 *Academy of Sciences*, 111(5), 1843–1848. <https://doi.org/10.1073/pnas.1323416111>
- 782 Koeppl, M., van Heeringen, S. J., Kramer, D., Smeenk, L., Janssen-Megens, E., Hartmann, M., ... Lohrum,  
783 M. (2011). Crosstalk between c-Jun and TAp73alpha/beta contributes to the apoptosis-survival balance.  
784 *Nucleic Acids Research*, 39(14), 6069–6085. <https://doi.org/10.1093/nar/gkr028>
- 785 Kyrousi, C., Lalioti, M.-E., Skavatsou, E., Lygerou, Z., & Taraviras, S. (2016). Mcidas and GemC1/Lynkeas  
786 specify embryonic radial glial cells. *Neurogenesis*, 3(1), e1172747.  
787 <https://doi.org/10.1080/23262133.2016.1172747>
- 788 Lambot, M.-A. H., Mendive, F., Laurent, P., Van Schoore, G., Noël, J.-C., Vanderhaeghen, P., & Vassart, G.  
789 (2009). Three-dimensional reconstruction of efferent ducts in wild-type and Lgr4 knock-out mice.  
790 *Anatomical Record (Hoboken, N.J.: 2007)*, 292(4), 595–603. <https://doi.org/10.1002/ar.20883>
- 791 Li, L., Grausam, K. B., Wang, J., Lun, M. P., Ohli, J., Lidov, H. G. W., ... Zhao, H. (2016). Sonic Hedgehog  
792 promotes proliferation of Notch-dependent monociliated choroid plexus tumour cells. *Nature Cell*  
793 *Biology*, 18(4), 418–430. <https://doi.org/10.1038/ncb3327>
- 794 Liao, Y., Smyth, G. K., & Shi, W. (2014). featureCounts: an efficient general purpose program for  
795 assigning sequence reads to genomic features. *Bioinformatics (Oxford, England)*, 30(7), 923–930.  
796 <https://doi.org/10.1093/bioinformatics/btt656>
- 797 Lindeman, G. J., Dagnino, L., Gaubatz, S., Xu, Y., Bronson, R. T., Warren, H. B., & Livingston, D. M. (1998).  
798 A specific, nonproliferative role for E2F-5 in choroid plexus function revealed by gene targeting. *Genes &*  
799 *Development*, 12(8), 1092–1098.
- 800 Lizé, M., Herr, C., Klimke, A., Bals, R., & Dobbstein, M. (2010). MicroRNA-449a levels increase by  
801 several orders of magnitude during mucociliary differentiation of airway epithelia. *Cell Cycle*  
802 *(Georgetown, Tex.)*, 9(22), 4579–4583. <https://doi.org/10.4161/cc.9.22.13870>
- 803 Lizé, M., Pilarski, S., & Dobbstein, M. (2010). E2F1-inducible microRNA 449a/b suppresses cell  
804 proliferation and promotes apoptosis. *Cell Death and Differentiation*, 17(3), 452–458.  
805 <https://doi.org/10.1038/cdd.2009.188>
- 806 Love, M. I., Huber, W., & Anders, S. (2014). Moderated estimation of fold change and dispersion for  
807 RNA-seq data with DESeq2. *Genome Biology*, 15(12), 550. <https://doi.org/10.1186/s13059-014-0550-8>
- 808 Lun, M. P., Johnson, M. B., Broadbelt, K. G., Watanabe, M., Kang, Y. -j., Chau, K. F., ... Lehtinen, M. K.  
809 (2015). Spatially Heterogeneous Choroid Plexus Transcriptomes Encode Positional Identity and  
810 Contribute to Regional CSF Production. *Journal of Neuroscience*, 35(12), 4903–4916.  
811 <https://doi.org/10.1523/JNEUROSCI.3081-14.2015>
- 812 Lun, M. P., Monuki, E. S., & Lehtinen, M. K. (2015). Development and functions of the choroid plexus-  
813 cerebrospinal fluid system. *Nature Reviews Neuroscience*, 16(8), 445–457.  
814 <https://doi.org/10.1038/nrn3921>

- 815 Lyons, R. A., Saridogan, E., & Djahanbakhch, O. (2006). The reproductive significance of human Fallopian  
816 tube cilia. *Human Reproduction Update*, 12(4), 363–372. <https://doi.org/10.1093/humupd/dml012>
- 817 Ma, L., Quigley, I., Omran, H., & Kintner, C. (2014). Multicilin drives centriole biogenesis via E2f proteins.  
818 *Genes & Development*, 28(13), 1461–1471. <https://doi.org/10.1101/gad.243832.114>
- 819 Marcet, B., Chevalier, B., Coraux, C., Kodjabachian, L., & Barbry, P. (2011). MicroRNA-based silencing of  
820 Delta/Notch signaling promotes multiple cilia formation. *Cell Cycle*, 10(17), 2858–2864.  
821 <https://doi.org/10.4161/cc.10.17.17011>
- 822 Marcet, B., Chevalier, B., Luxardi, G., Coraux, C., Zaragosi, L.-E., Cibois, M., ... Barbry, P. (2011). Control of  
823 vertebrate multiciliogenesis by miR-449 through direct repression of the Delta/Notch pathway. *Nature*  
824 *Cell Biology*, 13(6), 693–699. <https://doi.org/10.1038/ncb2241>
- 825 Marshall, C. B., Mays, D. J., Beeler, J. S., Rosenbluth, J. M., Boyd, K. L., Santos Guasch, G. L., ... Pietenpol,  
826 J. A. (2016). p73 Is Required for Multiciliogenesis and Regulates the Foxj1-Associated Gene Network. *Cell*  
827 *Reports*, 14(10), 2289–2300. <https://doi.org/10.1016/j.celrep.2016.02.035>
- 828 Martin, M. (2011). Cutadapt removes adapter sequences from high-throughput sequencing reads.  
829 *EMBnet.journal*, 17(1), 10. <https://doi.org/10.14806/ej.17.1.200>
- 830 Medina-Bolívar, C., González-Arnay, E., Talos, F., González-Gómez, M., Moll, U. M., & Meyer, G. (2014).  
831 Cortical hypoplasia and ventriculomegaly of p73-deficient mice: Developmental and adult analysis: p73  
832 in developing and adult cortex. *Journal of Comparative Neurology*, 522(11), 2663–2679.  
833 <https://doi.org/10.1002/cne.23556>
- 834 Mori, M., Hazan, R., Danielian, P. S., Mahoney, J. E., Li, H., Lu, J., ... Cardoso, W. V. (2017). Cytoplasmic  
835 E2f4 forms organizing centres for initiation of centriole amplification during multiciliogenesis. *Nature*  
836 *Communications*, 8, 15857. <https://doi.org/10.1038/ncomms15857>
- 837 Nemajerova, A., Kramer, D., Siller, S. S., Herr, C., Shomroni, O., Pena, T., ... Lizé, M. (2016). TAp73 is a  
838 central transcriptional regulator of airway multiciliogenesis. *Genes & Development*, 30(11), 1300–1312.  
839 <https://doi.org/10.1101/gad.279836.116>
- 840 Pefani, D.-E., Dimaki, M., Spella, M., Karantzelis, N., Mitsiki, E., Kyrousi, C., ... Lygerou, Z. (2011). Idas, a  
841 Novel Phylogenetically Conserved Geminin-related Protein, Binds to Geminin and Is Required for Cell  
842 Cycle Progression. *Journal of Biological Chemistry*, 286(26), 23234–23246.  
843 <https://doi.org/10.1074/jbc.M110.207688>
- 844 Raidt, J., Werner, C., Menchen, T., Dougherty, G. W., Olbrich, H., Loges, N. T., ... Omran, H. (2015). Ciliary  
845 function and motor protein composition of human fallopian tubes. *Human Reproduction (Oxford,*  
846 *England)*, 30(12), 2871–2880. <https://doi.org/10.1093/humrep/dev227>
- 847 Redshaw, N., Wheeler, G., Hajihosseini, M. K., & Dalmay, T. (2009). microRNA-449 is a putative regulator  
848 of choroid plexus development and function. *Brain Research*, 1250, 20–26.  
849 <https://doi.org/10.1016/j.brainres.2008.11.020>
- 850 Schindelin, J., Arganda-Carreras, I., Frise, E., Kaynig, V., Longair, M., Pietzsch, T., ... Cardona, A. (2012).  
851 Fiji: an open-source platform for biological-image analysis. *Nature Methods*, 9(7), 676–682.  
852 <https://doi.org/10.1038/nmeth.2019>

- 853 Silva-Vargas, V., Maldonado-Soto, A., Mizrak, D., Codega, P., & Doetsch, F. (2016). Age-Dependent Niche  
854 Signals from the Choroid Plexus Regulate Adult Neural Stem Cells. *Cell Stem Cell*, 19(5), 643–652.  
855 <https://doi.org/10.1016/j.stem.2016.06.013>
- 856 Song, R., Walentek, P., Sponer, N., Klimke, A., Lee, J. S., Dixon, G., ... He, L. (2014). miR-34/449 miRNAs  
857 are required for motile ciliogenesis by repressing cp110. *Nature*, 510(7503), 115–120.  
858 <https://doi.org/10.1038/nature13413>
- 859 Spassky, N., Merkle, F. T., Flames, N., Tramontin, A. D., García-Verdugo, J. M., & Alvarez-Buylla, A.  
860 (2005). Adult ependymal cells are postmitotic and are derived from radial glial cells during  
861 embryogenesis. *The Journal of Neuroscience: The Official Journal of the Society for Neuroscience*, 25(1),  
862 10–18. <https://doi.org/10.1523/JNEUROSCI.1108-04.2005>
- 863 Spassky, N., & Meunier, A. (2017). The development and functions of multiciliated epithelia. *Nature*  
864 *Reviews Molecular Cell Biology*, 18(7), 423–436. <https://doi.org/10.1038/nrm.2017.21>
- 865 Stubbs, J. L., Vldar, E. K., Axelrod, J. D., & Kintner, C. (2012). Multicilin promotes centriole assembly and  
866 ciliogenesis during multiciliate cell differentiation. *Nature Cell Biology*, 14(2), 140–147.  
867 <https://doi.org/10.1038/ncb2406>
- 868 Terré, B., Piergiorganni, G., Segura-Bayona, S., Gil-Gómez, G., Youssef, S. A., Attolini, C. S.-O., ... Stracker,  
869 T. H. (2016). GEMC1 is a critical regulator of multiciliated cell differentiation. *The EMBO Journal*, 35(9),  
870 942–960. <https://doi.org/10.15252/embj.201592821>
- 871 Tomasini, R., Tsuchihara, K., Wilhelm, M., Fujitani, M., Rufini, A., Cheung, C. C., ... Mak, T. W. (2008).  
872 TAp73 knockout shows genomic instability with infertility and tumor suppressor functions. *Genes &*  
873 *Development*, 22(19), 2677–2691. <https://doi.org/10.1101/gad.1695308>
- 874 Vanaken, G. J., Bassinet, L., Boon, M., Mani, R., Honoré, I., Papon, J.-F., ... Christin-Maitre, S. (2017).  
875 Infertility in an adult cohort with primary ciliary dyskinesia: phenotype–gene association. *European*  
876 *Respiratory Journal*, 50(5), 1700314. <https://doi.org/10.1183/13993003.00314-2017>
- 877 Yang, A., Walker, N., Bronson, R., Kaghad, M., Oosterwegel, M., Bonnin, J., ... Caput, D. (2000). p73-  
878 deficient mice have neurological, pheromonal and inflammatory defects but lack spontaneous tumours.  
879 *Nature*, 404(6773), 99–103. <https://doi.org/10.1038/35003607>
- 880 Yang, X., Feng, M., Jiang, X., Wu, Z., Li, Z., Aau, M., & Yu, Q. (2009). miR-449a and miR-449b are direct  
881 transcriptional targets of E2F1 and negatively regulate pRb-E2F1 activity through a feedback loop by  
882 targeting CDK6 and CDC25A. *Genes & Development*, 23(20), 2388–2393.  
883 <https://doi.org/10.1101/gad.1819009>
- 884 Yu, X., Ng, C. P., Habacher, H., & Roy, S. (2008). Foxj1 transcription factors are master regulators of the  
885 motile ciliogenic program. *Nature Genetics*, 40(12), 1445–1453. <https://doi.org/10.1038/ng.263>
- 886 Zhou, F., Narasimhan, V., Shboul, M., Chong, Y. L., Reversade, B., & Roy, S. (2015). Gmnc Is a Master  
887 Regulator of the Multiciliated Cell Differentiation Program. *Current Biology*, 25(24), 3267–3273.  
888 <https://doi.org/10.1016/j.cub.2015.10.062>
- 889
